# Supplementary material for: Psychometric Evaluation of the Altered States of Consciousness Rating Scale (OAV)
Source: PubMed Central journal article supplement (PMC2930851; doi:10.1371/journal.pone.0012412), 2010-08-31

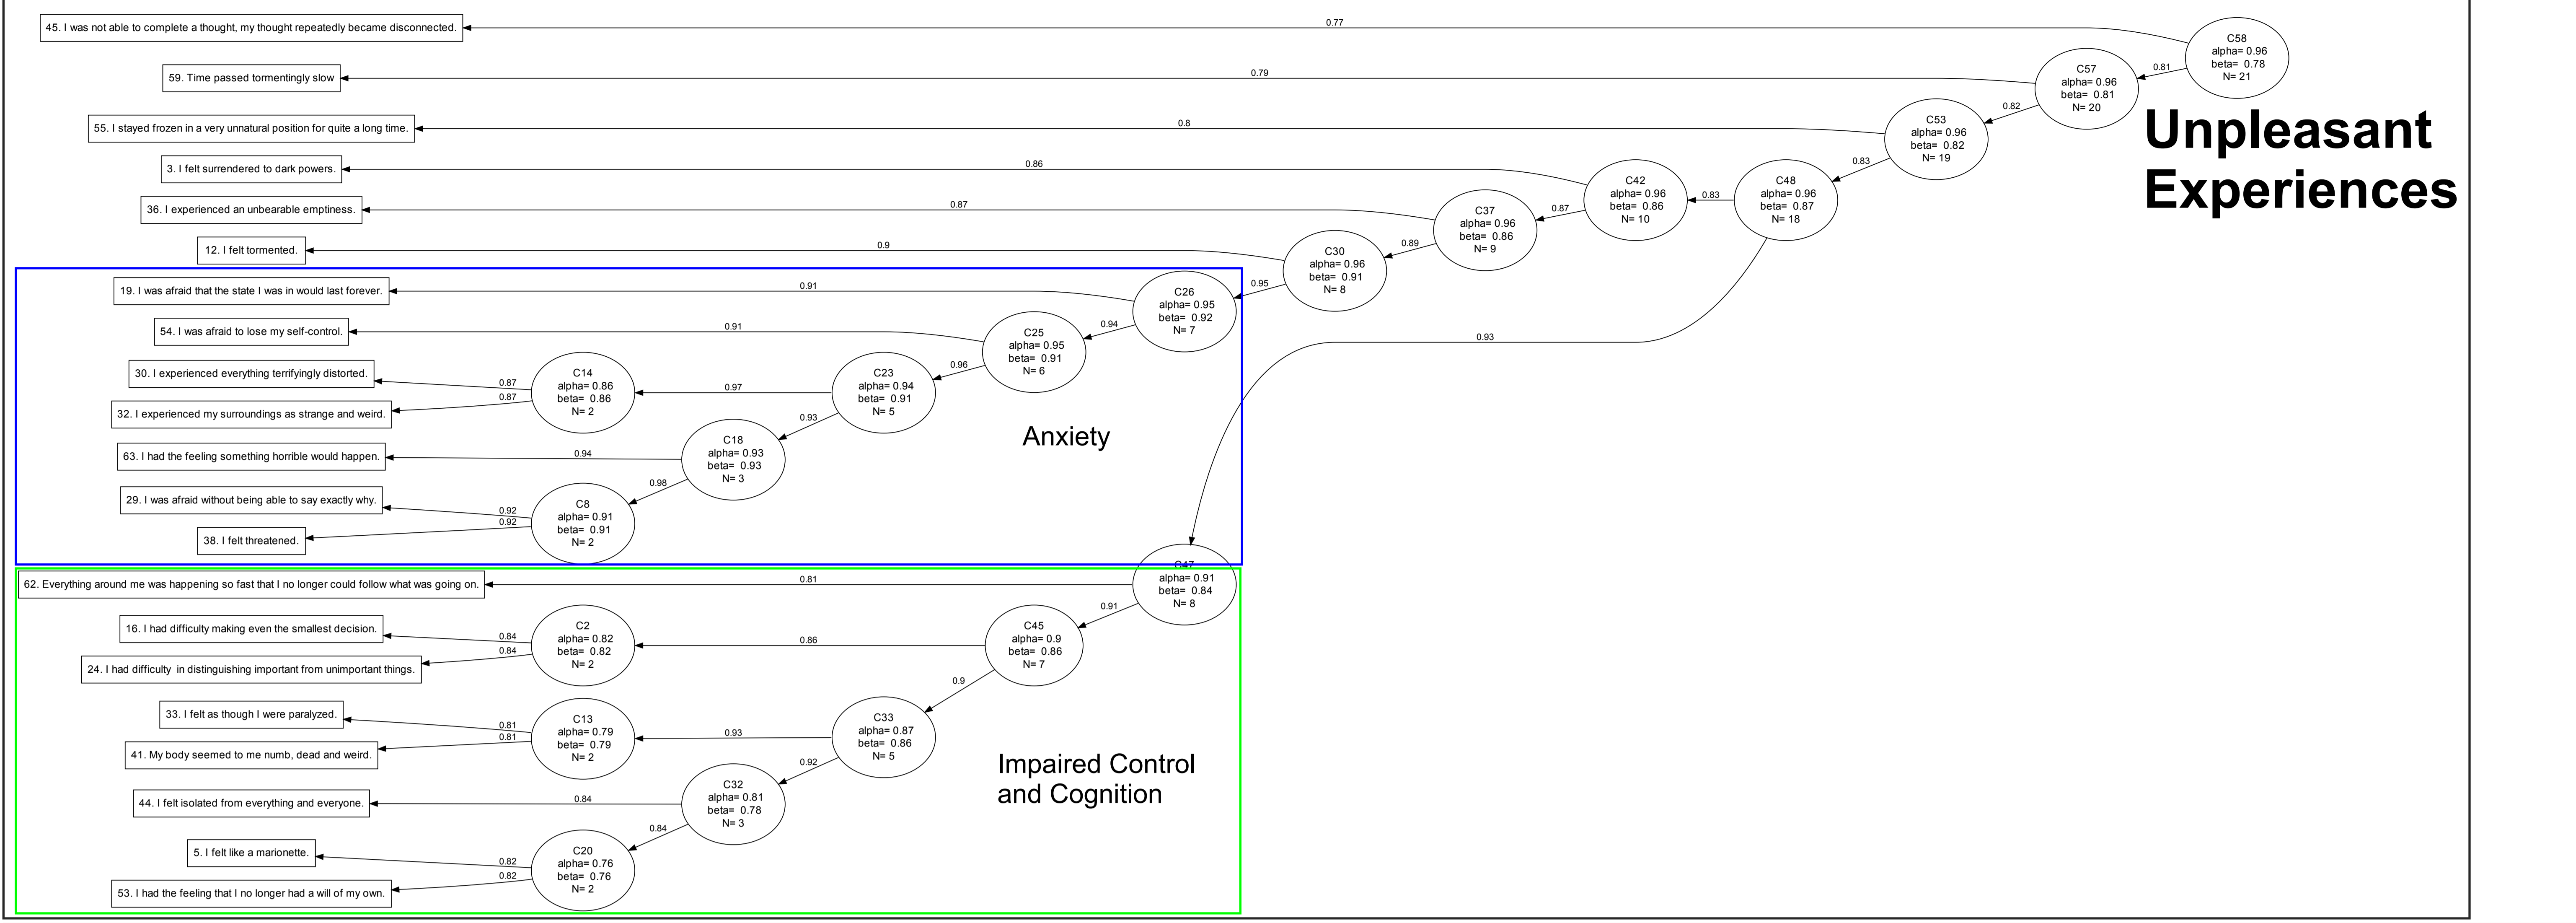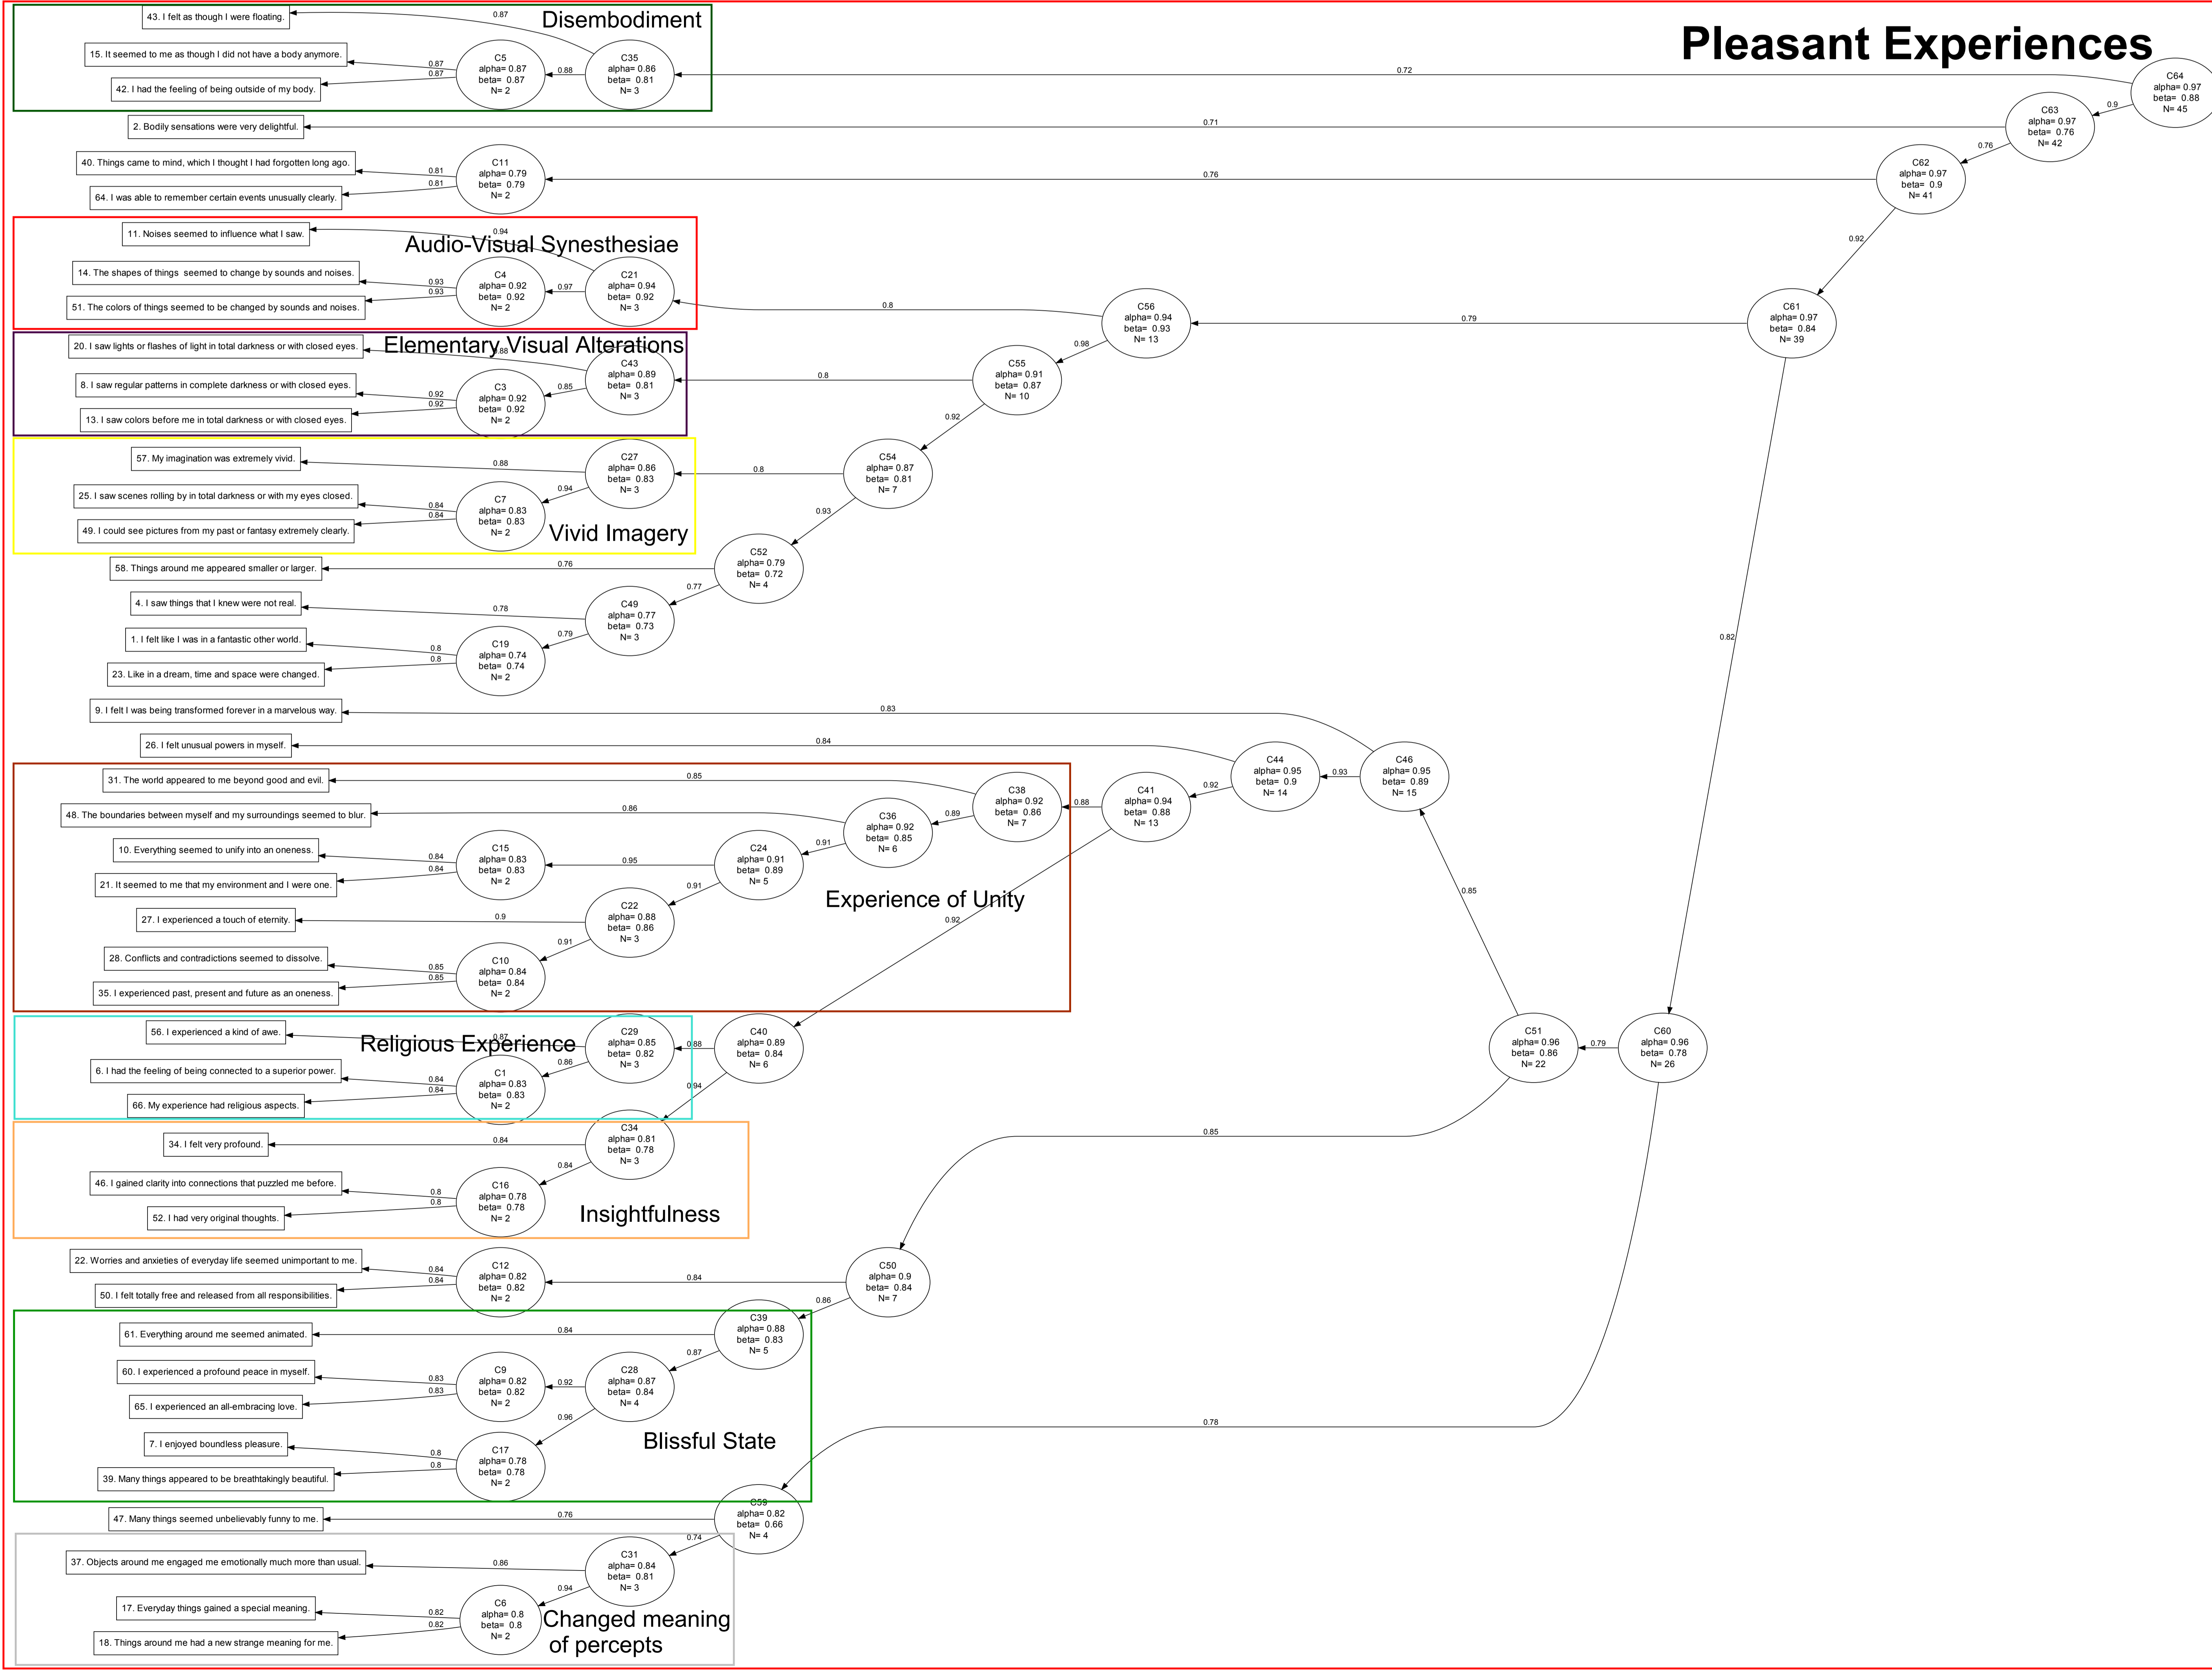

Supplement: pone.0012412.s002.pdf [file pone.0012412.s002.pdf]
