# Supplementary material for: Psychometric Evaluation of the Altered States of Consciousness Rating Scale (OAV)
Source: PubMed Central journal article supplement (PMC2930851; doi:10.1371/journal.pone.0012412), 2010-08-31
Supplement: pone.0012412.s003.pdf [file pone.0012412.s003.pdf]

**Supplementary Table S1.** Distributional characteristics of the uncategorized OAV items.

|                | mean  | sd    | median | min | max | skew  | kurtosis | % 0 values | % 100 values |
|----------------|-------|-------|--------|-----|-----|-------|----------|------------|--------------|
| <b>Item</b>    |       |       |        |     |     |       |          |            |              |
| 1              | 49.04 | 34.92 | 49.00  | 0   | 100 | 0.06  | -1.42    | 9.64       | 11.00        |
| 2              | 33.90 | 33.17 | 21.00  | 0   | 100 | 0.61  | -1.03    | 23.01      | 4.74         |
| 3              | 5.54  | 16.51 | 0.00   | 0   | 100 | 3.90  | 15.87    | 71.40      | 0.68         |
| 4              | 42.06 | 41.08 | 32.00  | 0   | 100 | 0.27  | -1.64    | 32.32      | 15.23        |
| 5              | 15.68 | 27.02 | 1.00   | 0   | 100 | 1.91  | 2.58     | 49.24      | 3.21         |
| 6              | 15.76 | 27.30 | 0.00   | 0   | 100 | 1.83  | 2.25     | 54.31      | 2.71         |
| 7              | 37.80 | 32.94 | 31.00  | 0   | 100 | 0.43  | -1.15    | 18.61      | 4.91         |
| 8              | 41.77 | 40.90 | 28.00  | 0   | 100 | 0.32  | -1.61    | 28.26      | 14.89        |
| 9              | 20.66 | 30.50 | 3.00   | 0   | 100 | 1.43  | 0.73     | 43.82      | 3.55         |
| 10             | 29.77 | 34.17 | 16.00  | 0   | 100 | 0.84  | -0.72    | 34.35      | 5.25         |
| 11             | 30.83 | 37.06 | 10.00  | 0   | 100 | 0.80  | -0.97    | 37.73      | 7.95         |
| 12             | 8.78  | 20.65 | 0.00   | 0   | 100 | 2.90  | 8.01     | 62.10      | 1.69         |
| 13             | 43.41 | 41.07 | 35.00  | 0   | 100 | 0.25  | -1.64    | 28.43      | 17.26        |
| 14             | 29.45 | 36.96 | 7.00   | 0   | 100 | 0.87  | -0.88    | 39.09      | 7.78         |
| 15             | 34.61 | 36.23 | 21.00  | 0   | 100 | 0.62  | -1.12    | 29.44      | 8.29         |
| 16             | 25.35 | 31.02 | 12.00  | 0   | 100 | 1.12  | 0.02     | 32.15      | 4.23         |
| 17             | 37.14 | 34.79 | 28.00  | 0   | 100 | 0.49  | -1.16    | 23.86      | 7.78         |
| 18             | 32.92 | 36.47 | 17.00  | 0   | 100 | 0.69  | -1.08    | 32.99      | 7.45         |
| 19             | 10.45 | 24.12 | 0.00   | 0   | 100 | 2.60  | 5.70     | 61.25      | 2.37         |
| 20             | 27.13 | 36.07 | 4.00   | 0   | 100 | 1.00  | -0.60    | 42.81      | 8.29         |
| 21             | 36.74 | 34.40 | 27.00  | 0   | 100 | 0.47  | -1.21    | 23.35      | 5.41         |
| 22             | 45.99 | 38.47 | 47.00  | 0   | 100 | 0.13  | -1.57    | 19.97      | 13.87        |
| 23             | 64.20 | 37.07 | 78.00  | 0   | 100 | -0.56 | -1.25    | 7.95       | 27.58        |
| 24             | 36.94 | 36.49 | 25.00  | 0   | 100 | 0.55  | -1.19    | 25.04      | 10.83        |
| 25             | 33.59 | 40.26 | 8.00   | 0   | 100 | 0.68  | -1.26    | 39.59      | 12.69        |
| 26             | 22.13 | 30.92 | 4.00   | 0   | 100 | 1.32  | 0.46     | 41.62      | 4.40         |
| 27             | 31.69 | 36.03 | 14.00  | 0   | 100 | 0.74  | -1.00    | 34.18      | 6.43         |
| 28             | 30.21 | 36.61 | 10.00  | 0   | 100 | 0.85  | -0.86    | 39.09      | 7.28         |
| 29             | 9.45  | 22.47 | 0.00   | 0   | 100 | 2.85  | 7.40     | 64.47      | 2.71         |
| 30             | 10.82 | 23.32 | 0.00   | 0   | 100 | 2.57  | 5.82     | 58.21      | 2.37         |
| 31             | 29.16 | 36.77 | 7.00   | 0   | 100 | 0.88  | -0.83    | 39.59      | 8.63         |
| 32             | 11.65 | 23.57 | 0.00   | 0   | 100 | 2.38  | 4.73     | 55.50      | 1.35         |
| 33             | 20.86 | 29.62 | 5.00   | 0   | 100 | 1.41  | 0.72     | 38.92      | 2.54         |
| 34             | 28.91 | 33.09 | 15.00  | 0   | 100 | 0.88  | -0.61    | 32.99      | 5.25         |
| 35             | 34.01 | 37.69 | 14.00  | 0   | 100 | 0.62  | -1.24    | 33.33      | 8.29         |
| 36             | 5.92  | 17.01 | 0.00   | 0   | 100 | 4.02  | 16.61    | 65.14      | 1.02         |
| 37             | 32.11 | 36.10 | 15.00  | 0   | 100 | 0.72  | -1.03    | 33.33      | 6.94         |
| 38             | 6.66  | 18.29 | 0.00   | 0   | 100 | 3.57  | 12.83    | 65.31      | 1.02         |
| 39             | 38.65 | 36.53 | 30.00  | 0   | 100 | 0.42  | -1.34    | 25.21      | 8.63         |
| 40             | 17.86 | 29.71 | 1.00   | 0   | 100 | 1.62  | 1.26     | 48.90      | 2.88         |
| 41             | 22.08 | 31.53 | 4.00   | 0   | 100 | 1.38  | 0.55     | 39.26      | 3.55         |
| 42             | 26.39 | 34.71 | 7.00   | 0   | 100 | 1.07  | -0.39    | 39.26      | 5.75         |
| 43             | 36.25 | 36.81 | 23.00  | 0   | 100 | 0.59  | -1.18    | 26.57      | 9.31         |
| 44             | 20.09 | 30.21 | 3.00   | 0   | 100 | 1.49  | 0.93     | 42.64      | 3.72         |
| 45             | 35.10 | 35.69 | 21.00  | 0   | 100 | 0.61  | -1.11    | 24.37      | 7.95         |
| 46             | 20.75 | 30.03 | 2.00   | 0   | 100 | 1.35  | 0.52     | 45.01      | 2.54         |
| 47             | 35.09 | 36.34 | 20.00  | 0   | 100 | 0.58  | -1.20    | 27.58      | 8.29         |
| 48             | 34.10 | 35.52 | 21.00  | 0   | 100 | 0.65  | -1.04    | 28.43      | 7.95         |
| 49             | 29.84 | 36.20 | 10.00  | 0   | 100 | 0.83  | -0.89    | 36.55      | 6.94         |
| 50             | 45.38 | 37.73 | 41.00  | 0   | 100 | 0.19  | -1.51    | 18.10      | 13.54        |
| 51             | 27.43 | 36.27 | 5.00   | 0   | 100 | 0.95  | -0.74    | 43.32      | 6.26         |
| 52             | 19.65 | 28.45 | 3.00   | 0   | 100 | 1.43  | 0.92     | 44.16      | 2.88         |
| 53             | 17.62 | 29.00 | 1.00   | 0   | 100 | 1.69  | 1.59     | 48.05      | 2.37         |
| 54             | 16.59 | 29.30 | 0.00   | 0   | 100 | 1.84  | 2.11     | 50.42      | 4.40         |
| 55             | 13.06 | 25.32 | 0.00   | 0   | 100 | 2.17  | 3.75     | 54.99      | 2.37         |
| 56             | 23.14 | 31.71 | 4.00   | 0   | 100 | 1.20  | 0.08     | 41.29      | 3.89         |
| 57             | 46.58 | 36.56 | 43.00  | 0   | 100 | 0.10  | -1.51    | 16.58      | 10.83        |
| 58             | 32.61 | 37.54 | 13.00  | 0   | 100 | 0.68  | -1.16    | 37.06      | 8.46         |
| 59             | 15.02 | 27.72 | 0.00   | 0   | 100 | 1.98  | 2.73     | 53.30      | 3.72         |
| 60             | 41.45 | 36.68 | 37.00  | 0   | 100 | 0.31  | -1.41    | 20.98      | 8.80         |
| 61             | 24.93 | 34.34 | 4.00   | 0   | 100 | 1.12  | -0.30    | 42.30      | 5.41         |
| 62             | 14.10 | 25.46 | 0.00   | 0   | 100 | 2.01  | 3.08     | 51.27      | 2.03         |
| 63             | 5.05  | 16.07 | 0.00   | 0   | 100 | 4.32  | 19.23    | 68.19      | 0.85         |
| 64             | 18.54 | 28.56 | 1.00   | 0   | 100 | 1.56  | 1.27     | 48.05      | 3.21         |
| 65             | 27.34 | 32.54 | 13.00  | 0   | 100 | 0.97  | -0.38    | 34.69      | 4.23         |
| 66             | 13.36 | 26.10 | 0.00   | 0   | 100 | 2.06  | 3.14     | 60.24      | 2.20         |
| <b>Summary</b> |       |       |        |     |     |       |          |            |              |
| min            | 5.05  | 16.07 | 0.00   | 0   | 100 | -0.56 | -1.64    | 7.95       | 0.68         |
| max            | 64.20 | 41.08 | 78.00  | 0   | 100 | 4.32  | 19.23    | 71.40      | 27.58        |
| mean           | 26.99 | 32.03 | 13.50  | 0   | 100 | 1.25  | 1.27     | 39.23      | 6.38         |
| sd             | 12.31 | 6.17  | 15.61  | 0   | 0   | 1.00  | 4.44     | 14.55      | 4.67         |
