# Supplementary material for: Psychometric Evaluation of the Altered States of Consciousness Rating Scale (OAV)
Source: PubMed Central journal article supplement (PMC2930851; doi:10.1371/journal.pone.0012412), 2010-08-31
Supplement: pone.0012412.s004.pdf [file pone.0012412.s004.pdf]

**Supplementary Table S2.** Distributional characteristics of the categorized OAV items.

|                | mean | sd   | median | min | max | skew  | kurtosis | % 1 values | % 5 values |
|----------------|------|------|--------|-----|-----|-------|----------|------------|------------|
| <b>Items</b>   |      |      |        |     |     |       |          |            |            |
| 1              | 3.06 | 1.25 | 3.00   | 1   | 5   | 0.17  | -1.01    | 9.64       | 28.76      |
| 2              | 2.50 | 1.19 | 2.00   | 1   | 5   | 0.50  | -0.61    | 7.78       | 32.15      |
| 3              | 1.39 | 0.74 | 1.00   | 1   | 5   | 2.45  | 7.14     | 1.02       | 71.40      |
| 4              | 2.77 | 1.57 | 3.00   | 1   | 5   | 0.24  | -1.48    | 12.35      | 32.32      |
| 5              | 1.83 | 1.07 | 2.00   | 1   | 5   | 1.44  | 1.62     | 3.21       | 49.24      |
| 6              | 1.78 | 1.07 | 1.00   | 1   | 5   | 1.47  | 1.60     | 3.05       | 54.31      |
| 7              | 2.65 | 1.20 | 3.00   | 1   | 5   | 0.38  | -0.69    | 9.64       | 29.78      |
| 8              | 2.81 | 1.55 | 2.00   | 1   | 5   | 0.27  | -1.44    | 9.64       | 28.26      |
| 9              | 2.00 | 1.17 | 2.00   | 1   | 5   | 1.16  | 0.51     | 5.41       | 43.82      |
| 10             | 2.31 | 1.29 | 2.00   | 1   | 5   | 0.75  | -0.47    | 7.45       | 34.35      |
| 11             | 2.37 | 1.42 | 2.00   | 1   | 5   | 0.69  | -0.87    | 9.14       | 37.73      |
| 12             | 1.54 | 0.86 | 1.00   | 1   | 5   | 2.00  | 4.48     | 1.35       | 62.10      |
| 13             | 2.84 | 1.55 | 3.00   | 1   | 5   | 0.20  | -1.46    | 11.34      | 28.43      |
| 14             | 2.33 | 1.41 | 2.00   | 1   | 5   | 0.74  | -0.80    | 9.64       | 39.09      |
| 15             | 2.52 | 1.37 | 2.00   | 1   | 5   | 0.54  | -0.90    | 9.14       | 29.44      |
| 16             | 2.21 | 1.16 | 2.00   | 1   | 5   | 0.87  | 0.02     | 6.77       | 34.69      |
| 17             | 2.60 | 1.29 | 2.00   | 1   | 5   | 0.46  | -0.78    | 9.64       | 27.07      |
| 18             | 2.45 | 1.38 | 2.00   | 1   | 5   | 0.59  | -0.90    | 10.49      | 32.99      |
| 19             | 1.62 | 0.98 | 1.00   | 1   | 5   | 1.91  | 3.35     | 3.05       | 61.25      |
| 20             | 2.22 | 1.38 | 2.00   | 1   | 5   | 0.88  | -0.52    | 7.28       | 42.81      |
| 21             | 2.59 | 1.26 | 2.00   | 1   | 5   | 0.44  | -0.78    | 10.83      | 28.26      |
| 22             | 2.96 | 1.43 | 3.00   | 1   | 5   | 0.11  | -1.32    | 15.23      | 23.35      |
| 23             | 3.65 | 1.37 | 4.00   | 1   | 5   | -0.49 | -1.12    | 7.95       | 41.62      |
| 24             | 2.62 | 1.36 | 2.00   | 1   | 5   | 0.48  | -0.93    | 9.48       | 28.26      |
| 25             | 2.47 | 1.55 | 2.00   | 1   | 5   | 0.61  | -1.17    | 6.77       | 39.59      |
| 26             | 2.05 | 1.18 | 2.00   | 1   | 5   | 1.07  | 0.33     | 5.08       | 41.62      |
| 27             | 2.40 | 1.35 | 2.00   | 1   | 5   | 0.63  | -0.82    | 10.83      | 34.18      |
| 28             | 2.34 | 1.41 | 2.00   | 1   | 5   | 0.72  | -0.80    | 7.78       | 39.09      |
| 29             | 1.54 | 0.92 | 1.00   | 1   | 5   | 2.11  | 4.45     | 2.20       | 64.47      |
| 30             | 1.63 | 0.96 | 1.00   | 1   | 5   | 1.89  | 3.53     | 2.03       | 58.21      |
| 31             | 2.31 | 1.40 | 2.00   | 1   | 5   | 0.77  | -0.71    | 8.12       | 39.59      |
| 32             | 1.65 | 0.92 | 1.00   | 1   | 5   | 1.70  | 2.89     | 2.37       | 55.50      |
| 33             | 2.03 | 1.11 | 2.00   | 1   | 5   | 1.06  | 0.43     | 4.57       | 38.92      |
| 34             | 2.31 | 1.25 | 2.00   | 1   | 5   | 0.72  | -0.46    | 8.46       | 32.99      |
| 35             | 2.49 | 1.42 | 2.00   | 1   | 5   | 0.54  | -1.03    | 11.00      | 33.33      |
| 36             | 1.45 | 0.75 | 1.00   | 1   | 5   | 2.37  | 7.24     | 1.35       | 65.14      |
| 37             | 2.42 | 1.37 | 2.00   | 1   | 5   | 0.62  | -0.82    | 9.48       | 33.33      |
| 38             | 1.47 | 0.79 | 1.00   | 1   | 5   | 2.22  | 5.90     | 1.35       | 65.31      |
| 39             | 2.68 | 1.37 | 3.00   | 1   | 5   | 0.35  | -1.06    | 12.01      | 25.21      |
| 40             | 1.90 | 1.15 | 2.00   | 1   | 5   | 1.32  | 0.92     | 5.41       | 48.90      |
| 41             | 2.09 | 1.22 | 2.00   | 1   | 5   | 1.15  | 0.42     | 4.91       | 39.26      |
| 42             | 2.22 | 1.33 | 2.00   | 1   | 5   | 0.91  | -0.34    | 6.26       | 39.26      |
| 43             | 2.59 | 1.37 | 2.00   | 1   | 5   | 0.51  | -0.93    | 8.80       | 27.92      |
| 44             | 2.02 | 1.18 | 2.00   | 1   | 5   | 1.17  | 0.55     | 5.25       | 42.64      |
| 45             | 2.59 | 1.32 | 2.00   | 1   | 5   | 0.50  | -0.87    | 11.00      | 30.29      |
| 46             | 1.99 | 1.15 | 2.00   | 1   | 5   | 1.09  | 0.39     | 5.41       | 45.01      |
| 47             | 2.55 | 1.35 | 2.00   | 1   | 5   | 0.51  | -0.92    | 10.83      | 27.58      |
| 48             | 2.51 | 1.33 | 2.00   | 1   | 5   | 0.56  | -0.77    | 7.95       | 28.43      |
| 49             | 2.33 | 1.36 | 2.00   | 1   | 5   | 0.76  | -0.66    | 8.29       | 36.55      |
| 50             | 2.94 | 1.40 | 3.00   | 1   | 5   | 0.19  | -1.24    | 11.68      | 25.21      |
| 51             | 2.23 | 1.39 | 2.00   | 1   | 5   | 0.84  | -0.63    | 8.80       | 43.32      |
| 52             | 1.96 | 1.10 | 2.00   | 1   | 5   | 1.11  | 0.63     | 4.23       | 44.16      |
| 53             | 1.90 | 1.14 | 2.00   | 1   | 5   | 1.35  | 1.08     | 4.06       | 48.05      |
| 54             | 1.86 | 1.15 | 1.00   | 1   | 5   | 1.45  | 1.34     | 3.55       | 50.42      |
| 55             | 1.71 | 1.00 | 1.00   | 1   | 5   | 1.66  | 2.48     | 2.71       | 54.99      |
| 56             | 2.10 | 1.21 | 2.00   | 1   | 5   | 0.97  | 0.02     | 6.77       | 41.29      |
| 57             | 2.97 | 1.35 | 3.00   | 1   | 5   | 0.11  | -1.16    | 16.24      | 24.70      |
| 58             | 2.42 | 1.42 | 2.00   | 1   | 5   | 0.61  | -0.97    | 10.49      | 37.06      |
| 59             | 1.79 | 1.09 | 1.00   | 1   | 5   | 1.51  | 1.63     | 4.40       | 53.30      |
| 60             | 2.79 | 1.36 | 3.00   | 1   | 5   | 0.28  | -1.10    | 13.03      | 25.21      |
| 61             | 2.17 | 1.32 | 2.00   | 1   | 5   | 0.92  | -0.36    | 8.80       | 42.30      |
| 62             | 1.76 | 1.00 | 1.00   | 1   | 5   | 1.49  | 1.94     | 3.38       | 51.27      |
| 63             | 1.41 | 0.72 | 1.00   | 1   | 5   | 2.46  | 7.77     | 1.02       | 68.19      |
| 64             | 1.90 | 1.10 | 2.00   | 1   | 5   | 1.24  | 0.85     | 4.57       | 48.05      |
| 65             | 2.26 | 1.24 | 2.00   | 1   | 5   | 0.79  | -0.29    | 6.09       | 34.69      |
| 66             | 1.68 | 1.04 | 1.00   | 1   | 5   | 1.68  | 2.30     | 2.37       | 60.24      |
| <b>Summary</b> |      |      |        |     |     |       |          |            |            |
| min            | 1.39 | 0.72 | 1.00   | 1   | 5   | -0.49 | -1.48    | 1.02       | 23.35      |
| max            | 3.65 | 1.57 | 4.00   | 1   | 5   | 2.46  | 7.77     | 16.24      | 71.40      |
| mean           | 2.23 | 1.23 | 1.94   | 1   | 5   | 0.95  | 0.49     | 7.12       | 41.00      |
| sd             | 0.47 | 0.20 | 0.65   | 0   | 0   | 0.64  | 2.20     | 3.64       | 12.37      |

Note. Items were categorized as follows: 0 = 1, 1-29 = 2, 30-69 = 3, 70-89 = 4, 90-100 = 5.
