# Supplementary material for: Psychometric Evaluation of the Altered States of Consciousness Rating Scale (OAV)
Source: PubMed Central journal article supplement (PMC2930851; doi:10.1371/journal.pone.0012412), 2010-08-31
Supplement: pone.0012412.s005.pdf [file pone.0012412.s005.pdf]

**Supplementary Table S3.** Item assignments in the exploratory structural equation model with three factors, geomin rotation, and no correlated residuals.

|                                                                                             | Item # | Highest loading | Hypothesized Item-factor membership |
|---------------------------------------------------------------------------------------------|--------|-----------------|-------------------------------------|
| <b>Factor 1</b>                                                                             |        |                 |                                     |
| I experienced an all-embracing love.                                                        | 65     | 0.80            | OBN                                 |
| It seemed to me that my environment and I were one.                                         | 21     | 0.79            | OBN                                 |
| I experienced a touch of eternity.                                                          | 27     | 0.77            | OBN                                 |
| I experienced a profound peace in myself.                                                   | 60     | 0.73            | OBN                                 |
| Conflicts and contradictions seemed to dissolve.                                            | 28     | 0.72            | OBN                                 |
| Everything seemed to unify into an oneness.                                                 | 10     | 0.71            | OBN                                 |
| I felt totally free and released from all responsibilities.                                 | 50     | 0.70            | OBN                                 |
| Everything around me seemed animated.                                                       | 61     | 0.70            | OBN                                 |
| Worries and anxieties of everyday life seemed unimportant to me.                            | 22     | 0.64            | OBN                                 |
| I enjoyed boundless pleasure.                                                               | 7      | 0.63            | OBN                                 |
| My experience had religious aspects.                                                        | 66     | 0.63            | OBN                                 |
| I felt unusual powers in myself.                                                            | 26     | 0.61            | OBN                                 |
| I experienced past, present and future as an oneness.                                       | 35     | 0.60            | OBN                                 |
| I had the feeling of being connected to a superior power.                                   | 6      | 0.58            | OBN                                 |
| Many things appeared to be breathtakingly beautiful.                                        | 39     | 0.57            | OBN                                 |
| The world appeared to me beyond good and evil.                                              | 31     | 0.57            | OBN                                 |
| I experienced a kind of awe.                                                                | 56     | 0.57            | OBN                                 |
| The boundaries between myself and my surroundings seemed to blur.                           | 48     | 0.55            | OBN                                 |
| I felt as though I were floating.                                                           | 43     | 0.53            | OBN                                 |
| I felt like I was in a fantastic other world.                                               | 1      | 0.52            | OBN                                 |
| I felt I was being transformed forever in a marvelous way.                                  | 9      | 0.51            | OBN                                 |
| I gained clarity into connections that puzzled me before.                                   | 46     | 0.50            | OBN                                 |
| I felt very profound.                                                                       | 34     | 0.49            | OBN                                 |
| It seemed to me as though I did not have a body anymore.                                    | 15     | 0.49            | OBN                                 |
| I had the feeling of being outside of my body.                                              | 42     | 0.47            | OBN                                 |
| I had very original thoughts.                                                               | 52     | 0.46            | VRS                                 |
| Bodily sensations were very delightful.                                                     | 2      | 0.45            | OBN                                 |
| Objects around me engaged me emotionally much more than usual.                              | 37     | 0.42            | VRS                                 |
| Things around me had a new strange meaning for me.                                          | 18     | 0.42            | VRS                                 |
| Like in a dream, time and space were changed.                                               | 23     | 0.38            | OBN                                 |
| Everyday things gained a special meaning.                                                   | 17     | 0.35            | VRS                                 |
| Things came to mind, which I thought I had forgotten long ago.                              | 40     | 0.34            | VRS                                 |
| I was able to remember certain events unusually clearly.                                    | 64     | 0.28            | VRS                                 |
| <b>Factor 2</b>                                                                             |        |                 |                                     |
| I felt threatened.                                                                          | 38     | 0.78            | DED                                 |
| I was afraid without being able to say exactly why.                                         | 29     | 0.76            | DED                                 |
| I was afraid to lose my self-control.                                                       | 54     | 0.76            | DED                                 |
| I experienced my surroundings as strange and weird.                                         | 32     | 0.76            | DED                                 |
| I experienced everything terrifyingly distorted.                                            | 30     | 0.75            | DED                                 |
| I had the feeling something horrible would happen.                                          | 63     | 0.74            | DED                                 |
| I felt tormented.                                                                           | 12     | 0.73            | DED                                 |
| I was afraid that the state I was in would last forever.                                    | 19     | 0.70            | DED                                 |
| I felt as though I were paralyzed.                                                          | 33     | 0.64            | DED                                 |
| I felt like a marionette.                                                                   | 5      | 0.62            | DED                                 |
| I had the feeling that I no longer had a will of my own.                                    | 53     | 0.59            | DED                                 |
| I felt isolated from everything and everyone.                                               | 44     | 0.58            | DED                                 |
| My body seemed to me numb, dead and weird.                                                  | 41     | 0.58            | DED                                 |
| I felt surrendered to dark powers.                                                          | 3      | 0.56            | DED                                 |
| I had difficulty making even the smallest decision.                                         | 16     | 0.54            | DED                                 |
| I experienced an unbearable emptiness.                                                      | 36     | 0.53            | DED                                 |
| Time passed tormentingly slow                                                               | 59     | 0.51            | DED                                 |
| I had difficulty in distinguishing important from unimportant things.                       | 24     | 0.49            | DED                                 |
| Everything around me was happening so fast that I no longer could follow what was going on. | 62     | 0.48            | DED                                 |
| I stayed frozen in a very unnatural position for quite a long time.                         | 55     | 0.42            | DED                                 |
| I was not able to complete a thought, my thought repeatedly became disconnected.            | 45     | 0.38            | DED                                 |
| Things around me appeared smaller or larger.                                                | 58     | 0.32            | VRS                                 |
| <b>Factor 3</b>                                                                             |        |                 |                                     |
| I saw colors before me in total darkness or with closed eyes.                               | 13     | 0.90            | VRS                                 |
| I saw regular patterns in complete darkness or with closed eyes.                            | 8      | 0.84            | VRS                                 |
| The shapes of things seemed to change by sounds and noises.                                 | 14     | 0.76            | VRS                                 |
| The colors of things seemed to be changed by sounds and noises.                             | 51     | 0.75            | VRS                                 |
| I saw scenes rolling by in total darkness or with my eyes closed.                           | 25     | 0.65            | VRS                                 |
| Noises seemed to influence what I saw.                                                      | 11     | 0.61            | VRS                                 |
| I saw lights or flashes of light in total darkness or with closed eyes.                     | 20     | 0.61            | VRS                                 |
| I saw things that I knew were not real.                                                     | 4      | 0.57            | VRS                                 |
| I could see pictures from my past or fantasy extremely clearly.                             | 49     | 0.51            | VRS                                 |
| My imagination was extremely vivid.                                                         | 57     | 0.47            | VRS                                 |
| Many things seemed unbelievably funny to me.                                                | 47     | 0.39            | VRS                                 |

*Note.* Items were assigned to the factor on which they loaded most strongly. Items not loading most strongly on their hypothesized factor are in red. OBN = oceanic boundlessness; DED = dread of ego dissolution; VRS = visionary restructuring.
