# Supplementary material for: Psychometric Evaluation of the Altered States of Consciousness Rating Scale (OAV)
Source: PubMed Central journal article supplement (PMC2930851; doi:10.1371/journal.pone.0012412), 2010-08-31
Supplement: pone.0012412.s007.pdf [file pone.0012412.s007.pdf]

**Supplementary Table S5.** The optimal number of factors to extract determined by different methods.

|                                                           | MDMA<br><i>n</i> = 102 | Ketamine<br><i>n</i> = 162 | Psilocybin<br><i>n</i> = 327 | Combined<br><i>n</i> = 591 |
|-----------------------------------------------------------|------------------------|----------------------------|------------------------------|----------------------------|
| Scree test                                                | 6                      | 5                          | 5                            | 5                          |
| PA with principal components and mean criterion           | 6                      | 5                          | 5                            | 5                          |
| PA with principal components and 95% percentile criterion | 6                      | 5                          | 5                            | 5                          |
| PA with principal factors and mean criterion              | 7                      | 5                          | 7                            | 7                          |
| PA with principal factors and 95% percentile criterion    | 7                      | 5                          | 7                            | 7                          |
| Minimum average partial test                              | 9                      | 5                          | 7                            | 7                          |
| ICLUST procedure with default settings                    | 4                      | 2                          | 2                            | 2                          |
| VSS criterion with complexity 1                           | 1                      | 1                          | 1                            | 1                          |
| VSS criterion with complexity 2                           | 4                      | 2                          | 2                            | 2                          |
| VSS criterion with complexity 3                           | 3                      | 4                          | 3                            | 4                          |

Note. PA = parallel analysis; ICLUST = item cluster analysis; VSS = very simple structure.
