# Supplementary material for: Psychometric Evaluation of the Altered States of Consciousness Rating Scale (OAV)
Source: PubMed Central journal article supplement (PMC2930851; doi:10.1371/journal.pone.0012412), 2010-08-31
Supplement: pone.0012412.s008.pdf [file pone.0012412.s008.pdf]

**Supplementary Table S6.** Loading matrices of exploratory structural equation models with an increasing number of factors.

|                                                                                                 | f1     | f2     | f3    |
|-------------------------------------------------------------------------------------------------|--------|--------|-------|
| <b>f1</b>                                                                                       |        |        |       |
| 65. I experienced an all-embracing love.                                                        | 0.797  | -0.268 |       |
| 21. It seemed to me that my environment and I were one.                                         | 0.788  |        |       |
| 27. I experienced a touch of eternity.                                                          | 0.773  |        |       |
| 60. I experienced a profound peace in myself.                                                   | 0.726  | -0.269 |       |
| 28. Conflicts and contradictions seemed to dissolve.                                            | 0.723  |        |       |
| 10. Everything seemed to unify into an oneness.                                                 | 0.712  |        |       |
| 50. I felt totally free and released from all responsibilities.                                 | 0.704  | -0.111 |       |
| 61. Everything around me seemed animated.                                                       | 0.697  |        |       |
| 22. Worries and anxieties of everyday life seemed unimportant to me.                            | 0.635  |        |       |
| 7. I enjoyed boundless pleasure.                                                                | 0.630  | -0.199 | 0.119 |
| 66. My experience had religious aspects.                                                        | 0.627  |        |       |
| 26. I felt unusual powers in myself.                                                            | 0.612  |        |       |
| 35. I experienced past, present and future as an oneness.                                       | 0.597  | 0.197  |       |
| 6. I had the feeling of being connected to a superior power.                                    | 0.577  |        |       |
| 39. Many things appeared to be breathtakingly beautiful.                                        | 0.574  | -0.164 | 0.318 |
| 31. The world appeared to me beyond good and evil.                                              | 0.571  | 0.277  |       |
| 56. I experienced a kind of awe.                                                                | 0.571  |        |       |
| 48. The boundaries between myself and my surroundings seemed to blur.                           | 0.548  | 0.279  |       |
| 43. I felt as though I were floating.                                                           | 0.532  | 0.199  |       |
| 1. I felt like I was in a fantastic other world.                                                | 0.518  |        | 0.206 |
| 9. I felt I was being transformed forever in a marvelous way.                                   | 0.514  | 0.181  |       |
| 46. I gained clarity into connections that puzzled me before.                                   | 0.501  |        |       |
| 34. I felt very profound.                                                                       | 0.489  |        | 0.111 |
| 15. It seemed to me as though I did not have a body anymore.                                    | 0.485  | 0.306  |       |
| 42. I had the feeling of being outside of my body.                                              | 0.468  | 0.342  |       |
| 52. I had very original thoughts.                                                               | 0.459  |        | 0.168 |
| 2. Bodily sensations were very delightful.                                                      | 0.450  |        | 0.106 |
| 37. Objects around me engaged me emotionally much more than usual.                              | 0.425  |        | 0.109 |
| 18. Things around me had a new strange meaning for me.                                          | 0.424  | 0.306  | 0.107 |
| 23. Like in a dream, time and space were changed.                                               | 0.379  | 0.214  | 0.288 |
| 17. Everyday things gained a special meaning.                                                   | 0.354  | 0.241  | 0.188 |
| 40. Things came to mind, which I thought I had forgotten long ago.                              | 0.336  |        | 0.209 |
| 64. I was able to remember certain events unusually clearly.                                    | 0.280  |        | 0.274 |
| <b>f2</b>                                                                                       |        |        |       |
| 38. I felt threatened.                                                                          |        | 0.783  |       |
| 29. I was afraid without being able to say exactly why.                                         |        | 0.762  |       |
| 32. I experienced my surroundings as strange and weird.                                         |        | 0.759  |       |
| 54. I was afraid to lose my self-control.                                                       |        | 0.759  |       |
| 30. I experienced everything terrifyingly distorted.                                            |        | 0.749  |       |
| 63. I had the feeling something horrible would happen.                                          | -0.134 | 0.741  |       |
| 12. I felt tormented.                                                                           | -0.208 | 0.733  | 0.114 |
| 19. I was afraid that the state I was in would last forever.                                    |        | 0.695  |       |
| 33. I felt as though I were paralyzed.                                                          |        | 0.640  |       |
| 5. I felt like a marionette.                                                                    |        | 0.620  |       |
| 53. I had the feeling that I no longer had a will of my own.                                    | 0.233  | 0.594  |       |
| 44. I felt isolated from everything and everyone.                                               |        | 0.583  |       |
| 41. My body seemed to me numb, dead and weird.                                                  | 0.176  | 0.579  |       |
| 3. I felt surrendered to dark powers.                                                           |        | 0.559  |       |
| 16. I had difficulty making even the smallest decision.                                         | 0.142  | 0.536  |       |
| 36. I experienced an unbearable emptiness.                                                      |        | 0.533  |       |
| 59. Time passed tormentingly slow                                                               | -0.112 | 0.508  | 0.109 |
| 24. I had difficulty in distinguishing important from unimportant things.                       | 0.298  | 0.491  |       |
| 62. Everything around me was happening so fast that I no longer could follow what was going on. |        | 0.483  | 0.135 |
| 55. I stayed frozen in a very unnatural position for quite a long time.                         | 0.139  | 0.424  |       |
| 45. I was not able to complete a thought, my thought repeatedly became disconnected.            |        | 0.384  | 0.255 |
| 58. Things around me appeared smaller or larger.                                                | 0.138  | 0.324  | 0.231 |
| <b>f3</b>                                                                                       |        |        |       |
| 13. I saw colors before me in total darkness or with closed eyes.                               | -0.135 |        | 0.896 |
| 8. I saw regular patterns in complete darkness or with closed eyes.                             | -0.158 |        | 0.842 |
| 14. The shapes of things seemed to change by sounds and noises.                                 |        |        | 0.760 |
| 51. The colors of things seemed to be changed by sounds and noises.                             |        |        | 0.750 |
| 25. I saw scenes rolling by in total darkness or with my eyes closed.                           |        |        | 0.648 |
| 11. Noises seemed to influence what I saw.                                                      | 0.152  |        | 0.610 |
| 20. I saw lights or flashes of light in total darkness or with closed eyes.                     |        |        | 0.610 |
| 4. I saw things that I knew were not real.                                                      |        | 0.155  | 0.572 |
| 49. I could see pictures from my past or fantasy extremely clearly.                             | 0.187  |        | 0.515 |
| 57. My imagination was extremely vivid.                                                         | 0.326  |        | 0.470 |
| 47. Many things seemed unbelievably funny to me.                                                | 0.172  |        | 0.392 |

Note. Loadings < 0.1 are not shown. Cross-loadings > half the size of the main factor loadings are in red.

|                                                                                                 | f1     | f2    | f3     | f4     |
|-------------------------------------------------------------------------------------------------|--------|-------|--------|--------|
| <b>f1</b>                                                                                       |        |       |        |        |
| 65. I experienced an all-embracing love.                                                        | 0.827  |       | -0.109 | -0.137 |
| 66. My experience had religious aspects.                                                        | 0.749  |       | 0.170  | -0.213 |
| 27. I experienced a touch of eternity.                                                          | 0.744  |       |        | 0.137  |
| 10. Everything seemed to unify into an oneness.                                                 | 0.681  |       |        | 0.144  |
| 21. It seemed to me that my environment and I were one.                                         | 0.673  |       | -0.117 | 0.264  |
| 61. Everything around me seemed animated.                                                       | 0.673  |       |        |        |
| 28. Conflicts and contradictions seemed to dissolve.                                            | 0.669  |       |        | 0.186  |
| 6. I had the feeling of being connected to a superior power.                                    | 0.657  |       | 0.166  |        |
| 60. I experienced a profound peace in myself.                                                   | 0.655  |       | -0.258 |        |
| 26. I felt unusual powers in myself.                                                            | 0.652  |       | 0.104  |        |
| 56. I experienced a kind of awe.                                                                | 0.621  |       | 0.159  |        |
| 39. Many things appeared to be breathtakingly beautiful.                                        | 0.601  | 0.304 |        |        |
| 46. I gained clarity into connections that puzzled me before.                                   | 0.600  |       | 0.224  | -0.126 |
| 7. I enjoyed boundless pleasure.                                                                | 0.584  | 0.118 | -0.176 |        |
| 34. I felt very profound.                                                                       | 0.580  |       | 0.222  | -0.108 |
| 50. I felt totally free and released from all responsibilities.                                 | 0.544  |       | -0.272 | 0.319  |
| 9. I felt I was being transformed forever in a marvelous way.                                   | 0.526  |       | 0.186  |        |
| 52. I had very original thoughts.                                                               | 0.505  | 0.160 |        |        |
| 22. Worries and anxieties of everyday life seemed unimportant to me.                            | 0.499  |       | -0.160 | 0.299  |
| 35. I experienced past, present and future as an oneness.                                       | 0.477  |       |        | 0.375  |
| 31. The world appeared to me beyond good and evil.                                              | 0.465  |       |        | 0.360  |
| 1. I felt like I was in a fantastic other world.                                                | 0.425  | 0.206 |        | 0.259  |
| 40. Things came to mind, which I thought I had forgotten long ago.                              | 0.423  | 0.197 | 0.144  | -0.130 |
| 37. Objects around me engaged me emotionally much more than usual.                              | 0.409  | 0.114 |        |        |
| 2. Bodily sensations were very delightful.                                                      | 0.401  | 0.109 |        |        |
| 18. Things around me had a new strange meaning for me.                                          | 0.349  | 0.114 | 0.149  | 0.301  |
| 64. I was able to remember certain events unusually clearly.                                    | 0.299  | 0.264 |        |        |
| 17. Everyday things gained a special meaning.                                                   | 0.292  | 0.196 | 0.110  | 0.250  |
| <b>f2</b>                                                                                       |        |       |        |        |
| 13. I saw colors before me in total darkness or with closed eyes.                               |        | 0.865 |        |        |
| 8. I saw regular patterns in complete darkness or with closed eyes.                             |        | 0.814 |        |        |
| 14. The shapes of things seemed to change by sounds and noises.                                 |        | 0.731 |        |        |
| 51. The colors of things seemed to be changed by sounds and noises.                             | 0.103  | 0.721 |        |        |
| 25. I saw scenes rolling by in total darkness or with my eyes closed.                           |        | 0.626 |        |        |
| 20. I saw lights or flashes of light in total darkness or with closed eyes.                     |        | 0.585 |        |        |
| 11. Noises seemed to influence what I saw.                                                      | 0.182  | 0.583 |        |        |
| 4. I saw things that I knew were not real.                                                      |        | 0.561 |        | 0.162  |
| 49. I could see pictures from my past or fantasy extremely clearly.                             | 0.205  | 0.497 |        |        |
| 57. My imagination was extremely vivid.                                                         | 0.298  | 0.461 |        | 0.129  |
| 47. Many things seemed unbelievably funny to me.                                                | 0.161  | 0.389 |        |        |
| <b>f3</b>                                                                                       |        |       |        |        |
| 38. I felt threatened.                                                                          |        |       | 0.808  |        |
| 29. I was afraid without being able to say exactly why.                                         |        |       | 0.793  |        |
| 12. I felt tormented.                                                                           |        | 0.109 | 0.779  |        |
| 63. I had the feeling something horrible would happen.                                          |        |       | 0.762  |        |
| 19. I was afraid that the state I was in would last forever.                                    |        |       | 0.658  | 0.101  |
| 32. I experienced my surroundings as strange and weird.                                         |        |       | 0.627  | 0.248  |
| 30. I experienced everything terrifyingly distorted.                                            |        |       | 0.620  | 0.229  |
| 54. I was afraid to lose my self-control.                                                       |        |       | 0.597  | 0.287  |
| 3. I felt surrendered to dark powers.                                                           |        |       | 0.526  |        |
| 36. I experienced an unbearable emptiness.                                                      |        |       | 0.480  | 0.124  |
| 59. Time passed tormentingly slow                                                               |        | 0.110 | 0.443  | 0.118  |
| <b>f4</b>                                                                                       |        |       |        |        |
| 41. My body seemed to me numb, dead and weird.                                                  |        |       | 0.155  | 0.680  |
| 33. I felt as though I were paralyzed.                                                          | -0.125 |       | 0.269  | 0.589  |
| 24. I had difficulty in distinguishing important from unimportant things.                       | 0.129  |       | 0.145  | 0.570  |
| 42. I had the feeling of being outside of my body.                                              | 0.289  |       |        | 0.559  |
| 15. It seemed to me as though I did not have a body anymore.                                    | 0.304  |       |        | 0.551  |
| 44. I felt isolated from everything and everyone.                                               |        |       | 0.241  | 0.546  |
| 53. I had the feeling that I no longer had a will of my own.                                    |        |       | 0.269  | 0.540  |
| 16. I had difficulty making even the smallest decision.                                         |        |       | 0.230  | 0.493  |
| 43. I felt as though I were floating.                                                           | 0.360  |       |        | 0.475  |
| 48. The boundaries between myself and my surroundings seemed to blur.                           | 0.398  |       |        | 0.466  |
| 5. I felt like a marionette.                                                                    |        |       | 0.345  | 0.442  |
| 23. Like in a dream, time and space were changed.                                               | 0.240  | 0.293 |        | 0.428  |
| 45. I was not able to complete a thought, my thought repeatedly became disconnected.            |        | 0.268 | 0.114  | 0.413  |
| 58. Things around me appeared smaller or larger.                                                |        | 0.237 |        | 0.383  |
| 55. I stayed frozen in a very unnatural position for quite a long time.                         |        |       | 0.209  | 0.359  |
| 62. Everything around me was happening so fast that I no longer could follow what was going on. |        | 0.142 | 0.288  | 0.312  |

|                                                                                                 | f1     | f2     | f3     | f4     | f5     |
|-------------------------------------------------------------------------------------------------|--------|--------|--------|--------|--------|
| <b>f1</b>                                                                                       |        |        |        |        |        |
| 14. The shapes of things seemed to change by sounds and noises.                                 | 0.845  |        |        |        | -0.154 |
| 13. I saw colors before me in total darkness or with closed eyes.                               | 0.826  |        |        |        |        |
| 51. The colors of things seemed to be changed by sounds and noises.                             | 0.814  |        |        |        | -0.113 |
| 8. I saw regular patterns in complete darkness or with closed eyes.                             | 0.754  | 0.101  |        |        |        |
| 11. Noises seemed to influence what I saw.                                                      | 0.695  |        |        |        | -0.190 |
| 25. I saw scenes rolling by in total darkness or with my eyes closed.                           | 0.601  |        |        |        |        |
| 20. I saw lights or flashes of light in total darkness or with closed eyes.                     | 0.567  |        |        |        |        |
| 4. I saw things that I knew were not real.                                                      | 0.501  | 0.100  | 0.108  |        | 0.155  |
| 49. I could see pictures from my past or fantasy extremely clearly.                             | 0.482  |        |        | 0.203  |        |
| 57. My imagination was extremely vivid.                                                         | 0.380  |        |        | 0.361  | 0.177  |
| <b>f2</b>                                                                                       |        |        |        |        |        |
| 38. I felt threatened.                                                                          |        | 0.826  |        |        |        |
| 29. I was afraid without being able to say exactly why.                                         |        | 0.804  |        |        |        |
| 12. I felt tormented.                                                                           | 0.107  | 0.796  |        |        |        |
| 63. I had the feeling something horrible would happen.                                          |        | 0.773  |        |        |        |
| 19. I was afraid that the state I was in would last forever.                                    |        | 0.686  |        |        |        |
| 32. I experienced my surroundings as strange and weird.                                         |        | 0.669  | 0.200  |        |        |
| 30. I experienced everything terrifyingly distorted.                                            |        | 0.668  | 0.169  |        |        |
| 54. I was afraid to lose my self-control.                                                       |        | 0.653  | 0.223  |        |        |
| 3. I felt surrendered to dark powers.                                                           |        | 0.533  |        |        | -0.100 |
| 36. I experienced an unbearable emptiness.                                                      |        | 0.501  | 0.100  |        |        |
| 59. Time passed tormentingly slow                                                               |        | 0.482  |        |        |        |
| 62. Everything around me was happening so fast that I no longer could follow what was going on. |        | 0.356  | 0.243  |        | 0.168  |
| <b>f3</b>                                                                                       |        |        |        |        |        |
| 41. My body seemed to me numb, dead and weird.                                                  |        | 0.204  | 0.720  | -0.192 |        |
| 15. It seemed to me as though I did not have a body anymore.                                    |        |        | 0.700  |        | -0.293 |
| 42. I had the feeling of being outside of my body.                                              |        |        | 0.691  |        | -0.251 |
| 33. I felt as though I were paralyzed.                                                          |        | 0.337  | 0.566  | -0.215 |        |
| 43. I felt as though I were floating.                                                           |        |        | 0.564  | 0.207  | -0.131 |
| 48. The boundaries between myself and my surroundings seemed to blur.                           |        |        | 0.527  | 0.271  |        |
| 53. I had the feeling that I no longer had a will of my own.                                    |        | 0.328  | 0.523  |        |        |
| 24. I had difficulty in distinguishing important from unimportant things.                       |        | 0.232  | 0.516  | 0.117  | 0.204  |
| 44. I felt isolated from everything and everyone.                                               |        | 0.315  | 0.500  | -0.101 | 0.120  |
| 35. I experienced past, present and future as an oneness.                                       | 0.113  |        | 0.461  | 0.337  | -0.165 |
| 31. The world appeared to me beyond good and evil.                                              |        |        | 0.428  | 0.346  | -0.138 |
| 16. I had difficulty making even the smallest decision.                                         |        | 0.316  | 0.426  |        | 0.203  |
| 23. Like in a dream, time and space were changed.                                               | 0.238  |        | 0.417  | 0.225  | 0.134  |
| 5. I felt like a marionette.                                                                    |        | 0.404  | 0.405  | -0.112 |        |
| 58. Things around me appeared smaller or larger.                                                | 0.224  | 0.135  | 0.353  |        |        |
| 55. I stayed frozen in a very unnatural position for quite a long time.                         |        | 0.266  | 0.318  |        | 0.115  |
| <b>f4</b>                                                                                       |        |        |        |        |        |
| 65. I experienced an all-embracing love.                                                        | -0.136 | -0.141 |        | 0.862  |        |
| 61. Everything around me seemed animated.                                                       |        |        |        | 0.685  |        |
| 7. I enjoyed boundless pleasure.                                                                |        | -0.156 |        | 0.678  | 0.209  |
| 66. My experience had religious aspects.                                                        |        |        |        | 0.671  | -0.348 |
| 39. Many things appeared to be breathtakingly beautiful.                                        | 0.238  |        |        | 0.666  |        |
| 60. I experienced a profound peace in myself.                                                   |        | -0.268 | 0.117  | 0.659  |        |
| 27. I experienced a touch of eternity.                                                          |        |        | 0.260  | 0.614  | -0.282 |
| 26. I felt unusual powers in myself.                                                            |        |        |        | 0.595  | -0.177 |
| 21. It seemed to me that my environment and I were one.                                         |        | -0.125 | 0.345  | 0.589  |        |
| 34. I felt very profound.                                                                       |        | 0.198  |        | 0.584  |        |
| 56. I experienced a kind of awe.                                                                |        | 0.133  |        | 0.584  | -0.147 |
| 10. Everything seemed to unify into an oneness.                                                 |        |        | 0.231  | 0.583  | -0.189 |
| 46. I gained clarity into connections that puzzled me before.                                   |        | 0.187  |        | 0.578  | -0.146 |
| 52. I had very original thoughts.                                                               |        |        |        | 0.574  |        |
| 28. Conflicts and contradictions seemed to dissolve.                                            |        |        | 0.284  | 0.553  | -0.209 |
| 37. Objects around me engaged me emotionally much more than usual.                              |        | 0.115  |        | 0.546  | 0.328  |
| 6. I had the feeling of being connected to a superior power.                                    |        |        |        | 0.535  | -0.384 |
| 50. I felt totally free and released from all responsibilities.                                 |        | -0.249 | 0.352  | 0.521  |        |
| 9. I felt I was being transformed forever in a marvelous way.                                   |        | 0.185  | 0.103  | 0.507  |        |
| 22. Worries and anxieties of everyday life seemed unimportant to me.                            |        | -0.130 | 0.312  | 0.497  | 0.115  |
| 2. Bodily sensations were very delightful.                                                      |        |        |        | 0.487  | 0.233  |
| 40. Things came to mind, which I thought I had forgotten long ago.                              | 0.154  | 0.133  | -0.122 | 0.465  |        |
| 1. I felt like I was in a fantastic other world.                                                | 0.156  |        | 0.271  | 0.419  |        |
| 18. Things around me had a new strange meaning for me.                                          |        | 0.214  | 0.248  | 0.409  | 0.228  |
| 17. Everyday things gained a special meaning.                                                   |        | 0.184  | 0.169  | 0.396  | 0.323  |
| 64. I was able to remember certain events unusually clearly.                                    | 0.221  |        |        | 0.341  |        |
| <b>f5</b>                                                                                       |        |        |        |        |        |
| 45. I was not able to complete a thought, my thought repeatedly became disconnected.            | 0.167  | 0.218  | 0.296  |        | 0.382  |
| 47. Many things seemed unbelievably funny to me.                                                | 0.266  |        |        | 0.323  | 0.372  |

|                                                                                                 | f1     | f2     | f3     | f4     | f5    | f6     |
|-------------------------------------------------------------------------------------------------|--------|--------|--------|--------|-------|--------|
| <b>f1</b>                                                                                       |        |        |        |        |       |        |
| 66. My experience had religious aspects.                                                        | 0.815  |        |        |        |       | -0.224 |
| 27. I experienced a touch of eternity.                                                          | 0.754  |        |        | 0.224  |       | -0.103 |
| 65. I experienced an all-embracing love.                                                        | 0.740  |        | -0.130 | -0.109 |       | 0.215  |
| 6. I had the feeling of being connected to a superior power.                                    | 0.726  |        |        |        |       | -0.260 |
| 10. Everything seemed to unify into an oneness.                                                 | 0.648  |        |        | 0.186  |       |        |
| 28. Conflicts and contradictions seemed to dissolve.                                            | 0.644  |        |        | 0.238  | 0.100 |        |
| 26. I felt unusual powers in myself.                                                            | 0.631  |        |        |        |       |        |
| 56. I experienced a kind of awe.                                                                | 0.619  |        | 0.113  |        |       |        |
| 21. It seemed to me that my environment and I were one.                                         | 0.615  |        | -0.102 | 0.292  |       | 0.108  |
| 46. I gained clarity into connections that puzzled me before.                                   | 0.596  | 0.116  | 0.161  |        |       |        |
| 61. Everything around me seemed animated.                                                       | 0.565  | -0.100 |        |        |       | 0.260  |
| 60. I experienced a profound peace in myself.                                                   | 0.561  |        | -0.242 |        |       | 0.242  |
| 34. I felt very profound.                                                                       | 0.552  | 0.112  | 0.185  |        |       |        |
| 9. I felt I was being transformed forever in a marvelous way.                                   | 0.504  |        | 0.180  |        |       |        |
| 39. Many things appeared to be breathtakingly beautiful.                                        | 0.504  | 0.168  |        |        | 0.130 | 0.303  |
| 35. I experienced past, present and future as an oneness.                                       | 0.463  |        |        | 0.411  |       |        |
| 7. I enjoyed boundless pleasure.                                                                | 0.458  |        | -0.118 |        |       | 0.409  |
| 31. The world appeared to me beyond good and evil.                                              | 0.452  |        | 0.113  | 0.380  |       |        |
| 50. I felt totally free and released from all responsibilities.                                 | 0.440  |        | -0.205 | 0.297  |       | 0.288  |
| 52. I had very original thoughts.                                                               | 0.436  | 0.146  |        |        |       | 0.230  |
| 40. Things came to mind, which I thought I had forgotten long ago.                              | 0.397  | 0.214  | 0.112  | -0.115 |       |        |
| 22. Worries and anxieties of everyday life seemed unimportant to me.                            | 0.396  |        |        | 0.256  |       | 0.291  |
| 1. I felt like I was in a fantastic other world.                                                | 0.371  | 0.174  |        | 0.238  |       | 0.203  |
| 64. I was able to remember certain events unusually clearly.                                    | 0.264  | 0.240  |        |        |       | 0.147  |
| <b>f2</b>                                                                                       |        |        |        |        |       |        |
| 13. I saw colors before me in total darkness or with closed eyes.                               |        | 0.772  |        |        | 0.197 |        |
| 8. I saw regular patterns in complete darkness or with closed eyes.                             |        | 0.715  |        |        | 0.168 |        |
| 25. I saw scenes rolling by in total darkness or with my eyes closed.                           | 0.135  | 0.654  |        | 0.102  |       |        |
| 20. I saw lights or flashes of light in total darkness or with closed eyes.                     |        | 0.543  |        |        | 0.116 |        |
| 4. I saw things that I knew were not real.                                                      |        | 0.479  |        | 0.118  |       | 0.142  |
| 49. I could see pictures from my past or fantasy extremely clearly.                             | 0.231  | 0.471  |        |        |       |        |
| 57. My imagination was extremely vivid.                                                         | 0.261  | 0.446  |        | 0.100  |       | 0.236  |
| <b>f3</b>                                                                                       |        |        |        |        |       |        |
| 38. I felt threatened.                                                                          |        | -0.112 | 0.852  |        |       |        |
| 29. I was afraid without being able to say exactly why.                                         |        |        | 0.821  |        |       |        |
| 12. I felt tormented.                                                                           |        |        | 0.803  |        | 0.104 |        |
| 63. I had the feeling something horrible would happen.                                          |        |        | 0.777  |        |       |        |
| 32. I experienced my surroundings as strange and weird.                                         |        |        | 0.690  | 0.163  |       |        |
| 54. I was afraid to lose my self-control.                                                       |        |        | 0.673  | 0.187  |       |        |
| 19. I was afraid that the state I was in would last forever.                                    |        |        | 0.672  |        |       |        |
| 30. I experienced everything terrifyingly distorted.                                            |        |        | 0.668  | 0.148  |       |        |
| 3. I felt surrendered to dark powers.                                                           |        | -0.114 | 0.564  |        | 0.143 |        |
| 36. I experienced an unbearable emptiness.                                                      |        |        | 0.514  |        |       |        |
| 59. Time passed tormentingly slow                                                               |        |        | 0.487  |        |       |        |
| 5. I felt like a marionette.                                                                    |        |        | 0.428  | 0.363  |       |        |
| 62. Everything around me was happening so fast that I no longer could follow what was going on. |        | 0.164  | 0.362  | 0.223  |       | 0.137  |
| 55. I stayed frozen in a very unnatural position for quite a long time.                         |        |        | 0.287  | 0.285  |       | 0.125  |
| <b>f4</b>                                                                                       |        |        |        |        |       |        |
| 41. My body seemed to me numb, dead and weird.                                                  |        |        | 0.211  | 0.674  |       | -0.112 |
| 15. It seemed to me as though I did not have a body anymore.                                    | 0.356  |        |        | 0.649  |       | -0.221 |
| 42. I had the feeling of being outside of my body.                                              | 0.327  |        |        | 0.641  |       | -0.186 |
| 33. I felt as though I were paralyzed.                                                          |        |        | 0.341  | 0.530  |       |        |
| 43. I felt as though I were floating.                                                           | 0.345  |        |        | 0.509  |       |        |
| 48. The boundaries between myself and my surroundings seemed to blur.                           | 0.364  |        |        | 0.467  |       |        |
| 53. I had the feeling that I no longer had a will of my own.                                    |        |        | 0.363  | 0.465  |       |        |
| 24. I had difficulty in distinguishing important from unimportant things.                       |        |        | 0.282  | 0.454  |       | 0.270  |
| 44. I felt isolated from everything and everyone.                                               |        |        | 0.357  | 0.447  |       | 0.130  |
| 23. Like in a dream, time and space were changed.                                               | 0.203  | 0.279  |        | 0.388  |       | 0.195  |
| 16. I had difficulty making even the smallest decision.                                         |        |        | 0.348  | 0.379  |       | 0.209  |
| 58. Things around me appeared smaller or larger.                                                |        |        | 0.176  | 0.314  | 0.159 | 0.160  |
| <b>f5</b>                                                                                       |        |        |        |        |       |        |
| 14. The shapes of things seemed to change by sounds and noises.                                 |        | 0.193  |        |        | 0.802 |        |
| 51. The colors of things seemed to be changed by sounds and noises.                             |        | 0.188  |        |        | 0.759 |        |
| 11. Noises seemed to influence what I saw.                                                      | 0.111  |        |        |        | 0.741 |        |
| <b>f6</b>                                                                                       |        |        |        |        |       |        |
| 37. Objects around me engaged me emotionally much more than usual.                              | 0.232  |        | 0.196  |        |       | 0.544  |
| 17. Everyday things gained a special meaning.                                                   | 0.162  |        | 0.237  | 0.124  |       | 0.452  |
| 47. Many things seemed unbelievably funny to me.                                                |        | 0.298  |        |        |       | 0.443  |
| 2. Bodily sensations were very delightful.                                                      | 0.267  |        |        |        |       | 0.403  |
| 45. I was not able to complete a thought, my thought repeatedly became disconnected.            | -0.190 | 0.184  | 0.262  | 0.262  |       | 0.386  |
| 18. Things around me had a new strange meaning for me.                                          | 0.249  |        | 0.261  | 0.196  |       | 0.359  |

|                                                                                                 | f1     | f2     | f3     | f4     | f5     | f6     | f7     |
|-------------------------------------------------------------------------------------------------|--------|--------|--------|--------|--------|--------|--------|
| <b>f1</b>                                                                                       |        |        |        |        |        |        |        |
| 13. I saw colors before me in total darkness or with closed eyes.                               | 0.870  |        |        |        |        |        |        |
| 8. I saw regular patterns in complete darkness or with closed eyes.                             | 0.811  |        | 0.107  |        |        |        |        |
| 25. I saw scenes rolling by in total darkness or with my eyes closed.                           | 0.655  | 0.109  |        | 0.149  |        |        |        |
| 20. I saw lights or flashes of light in total darkness or with closed eyes.                     | 0.600  |        | 0.102  |        |        |        |        |
| 4. I saw things that I knew were not real.                                                      | 0.501  | 0.145  |        |        |        | 0.142  |        |
| 49. I could see pictures from my past or fantasy extremely clearly.                             | 0.428  |        | -0.163 | 0.335  | -0.132 | 0.140  |        |
| 57. My imagination was extremely vivid.                                                         | 0.399  | 0.143  | -0.100 | 0.224  | 0.103  | 0.255  |        |
| <b>f2</b>                                                                                       |        |        |        |        |        |        |        |
| 41. My body seemed to me numb, dead and weird.                                                  |        | 0.737  |        |        | -0.185 |        |        |
| 42. I had the feeling of being outside of my body.                                              |        | 0.682  |        | 0.299  |        | -0.133 |        |
| 15. It seemed to me as though I did not have a body anymore.                                    |        | 0.676  |        | 0.270  |        | -0.213 |        |
| 33. I felt as though I were paralyzed.                                                          |        | 0.588  | 0.237  |        | -0.155 |        |        |
| 43. I felt as though I were floating.                                                           |        | 0.538  |        | 0.200  | 0.135  |        |        |
| 24. I had difficulty in distinguishing important from unimportant things.                       |        | 0.523  | 0.189  |        | 0.135  | 0.211  |        |
| 53. I had the feeling that I no longer had a will of my own.                                    |        | 0.522  | 0.286  |        |        |        |        |
| 44. I felt isolated from everything and everyone.                                               |        | 0.516  | 0.216  |        |        | 0.174  |        |
| 48. The boundaries between myself and my surroundings seemed to blur.                           |        | 0.516  |        | 0.259  |        |        |        |
| 35. I experienced past, present and future as an oneness.                                       |        | 0.449  |        | 0.355  |        |        |        |
| 16. I had difficulty making even the smallest decision.                                         |        | 0.439  | 0.266  |        |        | 0.167  |        |
| 23. Like in a dream, time and space were changed.                                               | 0.276  | 0.431  |        |        | 0.202  | 0.116  |        |
| 31. The world appeared to me beyond good and evil.                                              |        | 0.417  |        | 0.325  | 0.130  |        |        |
| 5. I felt like a marionette.                                                                    |        | 0.411  | 0.354  |        |        |        |        |
| 58. Things around me appeared smaller or larger.                                                | 0.119  | 0.364  |        |        |        | 0.178  | 0.140  |
| 55. I stayed frozen in a very unnatural position for quite a long time.                         |        | 0.340  | 0.176  |        |        | 0.175  |        |
| 62. Everything around me was happening so fast that I no longer could follow what was going on. | 0.124  | 0.278  | 0.254  |        |        | 0.185  |        |
| 1. I felt like I was in a fantastic other world.                                                | 0.179  | 0.270  |        | 0.191  | 0.266  | 0.118  |        |
| <b>f3</b>                                                                                       |        |        |        |        |        |        |        |
| 38. I felt threatened.                                                                          |        |        | 0.850  |        |        |        |        |
| 29. I was afraid without being able to say exactly why.                                         |        |        | 0.841  |        |        |        |        |
| 63. I had the feeling something horrible would happen.                                          |        |        | 0.796  |        |        |        |        |
| 12. I felt tormented.                                                                           |        |        | 0.761  |        | -0.122 |        |        |
| 19. I was afraid that the state I was in would last forever.                                    |        |        | 0.679  |        |        |        | -0.101 |
| 32. I experienced my surroundings as strange and weird.                                         |        | 0.204  | 0.651  |        |        |        |        |
| 30. I experienced everything terrifyingly distorted.                                            |        | 0.189  | 0.623  |        |        |        |        |
| 54. I was afraid to lose my self-control.                                                       |        | 0.237  | 0.608  |        |        |        |        |
| 3. I felt surrendered to dark powers.                                                           |        |        | 0.548  |        |        |        | 0.134  |
| 36. I experienced an unbearable emptiness.                                                      |        | 0.115  | 0.424  | 0.130  | -0.118 | 0.104  |        |
| 59. Time passed tormentingly slow                                                               |        |        | 0.405  |        | -0.111 | 0.126  |        |
| <b>f4</b>                                                                                       |        |        |        |        |        |        |        |
| 66. My experience had religious aspects.                                                        |        |        |        | 0.797  |        | -0.104 |        |
| 46. I gained clarity into connections that puzzled me before.                                   |        |        |        | 0.715  | -0.134 | 0.180  |        |
| 6. I had the feeling of being connected to a superior power.                                    |        |        |        | 0.678  |        | -0.181 |        |
| 27. I experienced a touch of eternity.                                                          |        |        |        | 0.626  | 0.138  |        |        |
| 56. I experienced a kind of awe.                                                                |        | 0.251  |        | 0.562  |        |        |        |
| 40. Things came to mind, which I thought I had forgotten long ago.                              | 0.113  |        |        | 0.545  | -0.151 | 0.301  |        |
| 34. I felt very profound.                                                                       |        |        | 0.133  | 0.539  |        | 0.138  |        |
| 26. I felt unusual powers in myself.                                                            |        |        |        | 0.534  | 0.137  |        |        |
| 28. Conflicts and contradictions seemed to dissolve.                                            |        | 0.269  |        | 0.514  | 0.151  |        |        |
| 10. Everything seemed to unify into an oneness.                                                 |        | 0.213  |        | 0.499  | 0.189  |        |        |
| 52. I had very original thoughts.                                                               |        |        |        | 0.492  |        | 0.365  |        |
| 9. I felt I was being transformed forever in a marvelous way.                                   |        | 0.121  | 0.120  | 0.461  |        | 0.115  |        |
| 61. Everything around me seemed animated.                                                       | -0.103 |        |        | 0.376  | 0.315  | 0.196  |        |
| 64. I was able to remember certain events unusually clearly.                                    | 0.179  |        | -0.117 | 0.325  |        | 0.254  |        |
| <b>f5</b>                                                                                       |        |        |        |        |        |        |        |
| 60. I experienced a profound peace in myself.                                                   |        |        |        |        | 0.732  |        |        |
| 7. I enjoyed boundless pleasure.                                                                |        |        |        |        | 0.669  | 0.130  |        |
| 22. Worries and anxieties of everyday life seemed unimportant to me.                            | 0.103  | 0.267  |        |        | 0.602  |        |        |
| 50. I felt totally free and released from all responsibilities.                                 |        | 0.308  |        |        | 0.600  |        |        |
| 65. I experienced an all-embracing love.                                                        |        | -0.119 |        | 0.411  | 0.540  |        |        |
| 39. Many things appeared to be breathtakingly beautiful.                                        | 0.229  |        |        | 0.237  | 0.449  | 0.154  |        |
| 21. It seemed to me that my environment and I were one.                                         |        | 0.307  |        | 0.307  | 0.423  |        |        |
| 2. Bodily sensations were very delightful.                                                      |        |        |        |        | 0.372  | 0.266  |        |
| <b>f6</b>                                                                                       |        |        |        |        |        |        |        |
| 37. Objects around me engaged me emotionally much more than usual.                              | -0.107 |        |        | 0.166  | 0.190  | 0.568  | 0.115  |
| 17. Everyday things gained a special meaning.                                                   |        | 0.207  |        | 0.158  |        | 0.527  |        |
| 18. Things around me had a new strange meaning for me.                                          |        | 0.286  |        | 0.264  |        | 0.467  |        |
| 45. I was not able to complete a thought, my thought repeatedly became disconnected.            | 0.157  | 0.332  | 0.118  | -0.185 |        | 0.383  |        |
| 47. Many things seemed unbelievably funny to me.                                                | 0.287  |        |        |        | 0.245  | 0.371  |        |
| <b>f7</b>                                                                                       |        |        |        |        |        |        |        |
| 14. The shapes of things seemed to change by sounds and noises.                                 | 0.458  |        |        |        |        |        | 0.684  |
| 11. Noises seemed to influence what I saw.                                                      | 0.322  |        |        |        |        |        | 0.641  |
| 51. The colors of things seemed to be changed by sounds and noises.                             | 0.453  |        |        |        |        |        | 0.640  |

|                                                                                                 | f1    | f2     | f3    | f4     | f5     | f6     | f7     | f8     |
|-------------------------------------------------------------------------------------------------|-------|--------|-------|--------|--------|--------|--------|--------|
| <b>f1</b>                                                                                       |       |        |       |        |        |        |        |        |
| 13. I saw colors before me in total darkness or with closed eyes.                               | 0.902 |        |       |        |        |        |        |        |
| 8. I saw regular patterns in complete darkness or with closed eyes.                             | 0.839 |        |       |        |        |        |        |        |
| 20. I saw lights or flashes of light in total darkness or with closed eyes.                     | 0.536 |        |       |        |        |        |        | 0.105  |
| 25. I saw scenes rolling by in total darkness or with my eyes closed.                           | 0.484 |        |       |        |        | -0.195 |        | 0.436  |
| 4. I saw things that I knew were not real.                                                      | 0.442 | 0.149  |       |        |        | 0.128  |        | 0.115  |
| <b>f2</b>                                                                                       |       |        |       |        |        |        |        |        |
| 41. My body seemed to me numb, dead and weird.                                                  |       | 0.732  | 0.105 |        | -0.186 |        |        |        |
| 15. It seemed to me as though I did not have a body anymore.                                    |       | 0.686  |       | 0.244  |        | -0.186 |        |        |
| 42. I had the feeling of being outside of my body.                                              |       | 0.677  |       | 0.225  |        | -0.158 |        |        |
| 33. I felt as though I were paralyzed.                                                          |       | 0.573  | 0.268 |        | -0.134 |        |        |        |
| 43. I felt as though I were floating.                                                           |       | 0.529  |       | 0.134  | 0.169  | -0.104 |        |        |
| 48. The boundaries between myself and my surroundings seemed to blur.                           |       | 0.527  |       | 0.276  |        |        |        |        |
| 24. I had difficulty in distinguishing important from unimportant things.                       |       | 0.521  | 0.196 |        | 0.121  | 0.215  |        |        |
| 53. I had the feeling that I no longer had a will of my own.                                    |       | 0.515  | 0.302 |        |        |        |        |        |
| 44. I felt isolated from everything and everyone.                                               |       | 0.503  | 0.242 |        |        | 0.159  |        |        |
| 35. I experienced past, present and future as an oneness.                                       |       | 0.452  |       | 0.323  |        |        |        |        |
| 16. I had difficulty making even the smallest decision.                                         |       | 0.439  | 0.260 |        |        | 0.184  |        |        |
| 23. Like in a dream, time and space were changed.                                               | 0.219 | 0.425  |       |        | 0.217  |        |        | 0.123  |
| 31. The world appeared to me beyond good and evil.                                              |       | 0.421  |       | 0.311  | 0.129  |        |        |        |
| 5. I felt like a marionette.                                                                    |       | 0.415  | 0.336 |        |        |        |        | -0.113 |
| 58. Things around me appeared smaller or larger.                                                |       | 0.355  |       |        |        | 0.159  | 0.163  |        |
| 55. I stayed frozen in a very unnatural position for quite a long time.                         |       | 0.325  | 0.209 |        |        | 0.130  |        | 0.118  |
| 1. I felt like I was in a fantastic other world.                                                | 0.181 | 0.282  |       | 0.227  | 0.236  | 0.119  |        |        |
| <b>f3</b>                                                                                       |       |        |       |        |        |        |        |        |
| 29. I was afraid without being able to say exactly why.                                         |       |        | 0.865 |        |        |        |        |        |
| 38. I felt threatened.                                                                          |       |        | 0.848 |        |        |        |        |        |
| 63. I had the feeling something horrible would happen.                                          |       |        | 0.835 |        |        | -0.118 |        |        |
| 12. I felt tormented.                                                                           |       |        | 0.753 |        | -0.132 |        |        |        |
| 19. I was afraid that the state I was in would last forever.                                    |       |        | 0.680 |        |        |        | -0.103 |        |
| 30. I experienced everything terrifyingly distorted.                                            |       | 0.169  | 0.650 |        |        |        |        |        |
| 32. I experienced my surroundings as strange and weird.                                         |       | 0.196  | 0.650 |        |        |        |        |        |
| 54. I was afraid to lose my self-control.                                                       |       | 0.219  | 0.631 |        |        |        |        |        |
| 3. I felt surrendered to dark powers.                                                           |       |        | 0.544 |        |        |        | 0.136  |        |
| 36. I experienced an unbearable emptiness.                                                      |       |        | 0.448 | 0.109  |        |        |        |        |
| 59. Time passed tormentingly slow.                                                              |       |        | 0.415 |        |        | 0.104  |        |        |
| 62. Everything around me was happening so fast that I no longer could follow what was going on. | 0.259 | 0.294  |       |        |        | 0.122  |        | 0.114  |
| <b>f4</b>                                                                                       |       |        |       |        |        |        |        |        |
| 66. My experience had religious aspects.                                                        |       |        |       | 0.783  |        | -0.130 |        |        |
| 46. I gained clarity into connections that puzzled me before.                                   |       |        |       | 0.668  | -0.110 |        |        | 0.152  |
| 6. I had the feeling of being connected to a superior power.                                    |       |        |       | 0.666  |        | -0.187 |        |        |
| 27. I experienced a touch of eternity.                                                          |       | 0.276  |       | 0.646  |        |        |        |        |
| 56. I experienced a kind of awe.                                                                |       |        |       | 0.570  |        |        |        |        |
| 34. I felt very profound.                                                                       |       |        | 0.119 | 0.544  |        |        |        |        |
| 26. I felt unusual powers in myself.                                                            |       |        |       | 0.536  | 0.124  |        |        |        |
| 28. Conflicts and contradictions seemed to dissolve.                                            |       | 0.287  |       | 0.524  | 0.122  |        |        |        |
| 10. Everything seemed to unify into an oneness.                                                 |       | 0.228  |       | 0.505  | 0.166  |        |        |        |
| 9. I felt I was being transformed forever in a marvelous way.                                   |       | 0.132  | 0.106 | 0.472  |        |        |        |        |
| 52. I had very original thoughts.                                                               |       |        |       | 0.469  |        | 0.273  |        | 0.179  |
| 40. Things came to mind, which I thought I had forgotten long ago.                              |       |        |       | 0.423  |        | 0.144  |        | 0.384  |
| 61. Everything around me seemed animated.                                                       |       |        |       | 0.421  | 0.295  | 0.179  |        |        |
| <b>f5</b>                                                                                       |       |        |       |        |        |        |        |        |
| 60. I experienced a profound peace in myself.                                                   |       |        |       |        | 0.761  | -0.121 |        |        |
| 7. I enjoyed boundless pleasure.                                                                |       |        |       |        | 0.705  |        |        | 0.103  |
| 50. I felt totally free and released from all responsibilities.                                 |       | 0.300  |       |        | 0.631  |        |        |        |
| 22. Worries and anxieties of everyday life seemed unimportant to me.                            |       | 0.282  |       |        | 0.565  |        |        | -0.143 |
| 65. I experienced an all-embracing love.                                                        |       | -0.116 |       | 0.397  | 0.556  |        |        |        |
| 39. Many things appeared to be breathtakingly beautiful.                                        | 0.218 |        |       | 0.288  | 0.423  | 0.146  | 0.102  |        |
| 2. Bodily sensations were very delightful.                                                      |       |        |       |        | 0.419  | 0.192  |        | 0.126  |
| 21. It seemed to me that my environment and I were one.                                         |       | 0.320  |       | 0.326  | 0.396  |        |        |        |
| <b>f6</b>                                                                                       |       |        |       |        |        |        |        |        |
| 37. Objects around me engaged me emotionally much more than usual.                              |       |        |       | 0.289  | 0.147  | 0.574  |        |        |
| 17. Everyday things gained a special meaning.                                                   |       | 0.217  |       | 0.255  |        | 0.523  |        |        |
| 18. Things around me had a new strange meaning for me.                                          |       | 0.312  |       | 0.406  |        | 0.515  |        |        |
| 45. I was not able to complete a thought, my thought repeatedly became disconnected.            |       | 0.309  | 0.163 | -0.200 |        | 0.318  |        | 0.178  |
| 47. Many things seemed unbelievably funny to me.                                                | 0.244 |        |       |        | 0.264  | 0.313  |        | 0.136  |
| <b>f7</b>                                                                                       |       |        |       |        |        |        |        |        |
| 14. The shapes of things seemed to change by sounds and noises.                                 | 0.304 |        |       |        |        |        | 0.745  |        |
| 51. The colors of things seemed to be changed by sounds and noises.                             | 0.276 |        |       |        |        |        | 0.710  |        |
| 11. Noises seemed to influence what I saw.                                                      | 0.174 |        |       |        |        |        | 0.694  |        |
| <b>f8</b>                                                                                       |       |        |       |        |        |        |        |        |
| 49. I could see pictures from my past or fantasy extremely clearly.                             | 0.155 |        |       |        |        |        |        | 0.704  |
| 64. I was able to remember certain events unusually clearly.                                    |       |        |       | 0.139  |        |        |        | 0.525  |
| 57. My imagination was extremely vivid.                                                         | 0.263 | 0.123  |       | 0.114  | 0.167  | 0.122  |        | 0.369  |

|                                                                                                 | f1    | f2    | f3    | f4     | f5     | f6     | f7     | f8     | f9     |
|-------------------------------------------------------------------------------------------------|-------|-------|-------|--------|--------|--------|--------|--------|--------|
| <b>f1</b>                                                                                       |       |       |       |        |        |        |        |        |        |
| 13. I saw colors before me in total darkness or with closed eyes.                               | 0.911 |       |       |        |        |        |        |        |        |
| 8. I saw regular patterns in complete darkness or with closed eyes.                             | 0.834 |       |       |        |        |        |        |        |        |
| 20. I saw lights or flashes of light in total darkness or with closed eyes.                     | 0.538 |       |       |        |        |        |        | 0.103  |        |
| 4. I saw things that I knew were not real.                                                      | 0.425 |       | 0.115 |        |        | 0.167  |        | 0.142  |        |
| <b>f2</b>                                                                                       |       |       |       |        |        |        |        |        |        |
| 29. I was afraid without being able to say exactly why.                                         |       | 0.858 |       |        |        |        |        |        |        |
| 63. I had the feeling something horrible would happen.                                          |       | 0.855 |       |        |        | -0.194 |        |        | 0.171  |
| 38. I felt threatened.                                                                          |       | 0.853 |       |        |        |        |        |        |        |
| 12. I felt tormented.                                                                           |       | 0.757 |       |        | -0.138 |        |        |        |        |
| 19. I was afraid that the state I was in would last forever.                                    |       | 0.682 |       |        |        |        | -0.103 |        |        |
| 32. I experienced my surroundings as strange and weird.                                         |       | 0.656 | 0.188 |        |        |        |        |        |        |
| 30. I experienced everything terrifyingly distorted.                                            |       | 0.655 | 0.179 |        |        |        |        |        |        |
| 54. I was afraid to lose my self-control.                                                       |       | 0.630 | 0.213 |        |        |        |        |        |        |
| 3. I felt surrendered to dark powers.                                                           |       | 0.551 |       | 0.134  |        |        | 0.141  |        | -0.276 |
| 36. I experienced an unbearable emptiness.                                                      |       | 0.451 | 0.145 |        |        |        |        |        | 0.258  |
| 59. Time passed tormentingly slow                                                               |       | 0.420 |       |        |        |        |        |        | 0.171  |
| 62. Everything around me was happening so fast that I no longer could follow what was going on. | 0.104 | 0.291 | 0.268 |        |        | 0.108  |        |        | 0.112  |
| <b>f3</b>                                                                                       |       |       |       |        |        |        |        |        |        |
| 41. My body seemed to me numb, dead and weird.                                                  |       | 0.103 | 0.745 |        | -0.179 |        |        |        |        |
| 42. I had the feeling of being outside of my body.                                              |       |       | 0.735 | 0.190  |        | -0.204 |        |        | 0.131  |
| 15. It seemed to me as though I did not have a body anymore.                                    |       |       | 0.700 | 0.231  |        | -0.183 |        |        |        |
| 43. I felt as though I were floating.                                                           |       |       | 0.568 |        | 0.190  | -0.140 |        |        |        |
| 33. I felt as though I were paralyzed.                                                          |       | 0.268 | 0.548 |        | -0.141 |        |        |        |        |
| 48. The boundaries between myself and my surroundings seemed to blur.                           |       |       | 0.516 | 0.259  |        |        |        |        |        |
| 44. I felt isolated from everything and everyone.                                               |       | 0.241 | 0.496 |        |        | 0.158  |        |        |        |
| 53. I had the feeling that I no longer had a will of my own.                                    |       | 0.300 | 0.486 |        |        |        |        |        |        |
| 24. I had difficulty in distinguishing important from unimportant things.                       |       | 0.196 | 0.480 |        | 0.113  | 0.255  |        |        |        |
| 35. I experienced past, present and future as an oneness.                                       |       |       | 0.456 | 0.300  | 0.108  |        |        |        |        |
| 31. The world appeared to me beyond good and evil.                                              |       |       | 0.430 | 0.298  | 0.138  |        |        |        |        |
| 23. Like in a dream, time and space were changed.                                               | 0.213 |       | 0.418 |        | 0.226  |        |        | 0.123  |        |
| 16. I had difficulty making even the smallest decision.                                         |       | 0.259 | 0.405 |        |        | 0.217  |        |        |        |
| 58. Things around me appeared smaller or larger.                                                |       | 0.104 | 0.372 |        |        | 0.116  | 0.155  |        | 0.150  |
| 5. I felt like a marionette.                                                                    |       | 0.335 | 0.367 |        | -0.103 | 0.145  |        |        | -0.179 |
| 55. I stayed frozen in a very unnatural position for quite a long time.                         |       | 0.207 | 0.292 |        |        | 0.171  |        | 0.136  |        |
| 1. I felt like I was in a fantastic other world.                                                | 0.172 |       | 0.259 | 0.222  | 0.241  | 0.140  |        |        |        |
| <b>f4</b>                                                                                       |       |       |       |        |        |        |        |        |        |
| 66. My experience had religious aspects.                                                        |       |       |       | 0.808  |        |        |        |        |        |
| 6. I had the feeling of being connected to a superior power.                                    |       |       |       | 0.704  |        | -0.137 |        |        | -0.140 |
| 27. I experienced a touch of eternity.                                                          |       |       | 0.268 | 0.639  | 0.109  |        |        |        |        |
| 46. I gained clarity into connections that puzzled me before.                                   |       |       |       | 0.637  |        |        |        |        | 0.289  |
| 56. I experienced a kind of awe.                                                                |       |       |       | 0.555  |        |        |        |        |        |
| 26. I felt unusual powers in myself.                                                            |       |       |       | 0.550  | 0.122  |        |        |        |        |
| 28. Conflicts and contradictions seemed to dissolve.                                            |       |       | 0.267 | 0.532  | 0.119  |        |        |        |        |
| 34. I felt very profound.                                                                       |       | 0.118 |       | 0.518  |        |        |        |        | 0.199  |
| 10. Everything seemed to unify into an oneness.                                                 |       |       | 0.208 | 0.511  | 0.167  |        |        |        |        |
| 9. I felt I was being transformed forever in a marvelous way.                                   |       | 0.102 | 0.108 | 0.479  |        | 0.109  |        |        |        |
| 52. I had very original thoughts.                                                               |       |       |       | 0.447  |        | 0.244  |        | 0.118  | 0.188  |
| 61. Everything around me seemed animated.                                                       |       |       |       | 0.389  | 0.314  | 0.133  |        |        | 0.142  |
| 40. Things came to mind, which I thought I had forgotten long ago.                              |       |       |       | 0.372  |        |        |        | 0.301  | 0.362  |
| <b>f5</b>                                                                                       |       |       |       |        |        |        |        |        |        |
| 60. I experienced a profound peace in myself.                                                   |       |       |       |        | 0.769  | -0.139 |        |        |        |
| 7. I enjoyed boundless pleasure.                                                                |       |       |       |        | 0.700  |        |        | 0.127  |        |
| 50. I felt totally free and released from all responsibilities.                                 |       |       | 0.309 |        | 0.628  |        |        |        |        |
| 65. I experienced an all-embracing love.                                                        |       |       |       | 0.382  | 0.569  |        |        |        |        |
| 22. Worries and anxieties of everyday life seemed unimportant to me.                            |       |       | 0.267 |        | 0.558  |        |        | -0.118 |        |
| 2. Bodily sensations were very delightful.                                                      |       |       |       |        | 0.428  | 0.162  |        |        | 0.121  |
| 39. Many things appeared to be breathtakingly beautiful.                                        | 0.226 |       |       | 0.282  | 0.427  | 0.140  |        |        |        |
| 21. It seemed to me that my environment and I were one.                                         |       |       | 0.310 | 0.321  | 0.401  |        |        |        |        |
| <b>f6</b>                                                                                       |       |       |       |        |        |        |        |        |        |
| 18. Things around me had a new strange meaning for me.                                          |       |       | 0.250 | 0.401  |        | 0.541  |        |        |        |
| 17. Everyday things gained a special meaning.                                                   |       |       | 0.171 | 0.245  |        | 0.532  |        |        |        |
| 37. Objects around me engaged me emotionally much more than usual.                              |       |       |       | 0.251  | 0.166  | 0.520  |        |        | 0.204  |
| 45. I was not able to complete a thought, my thought repeatedly became disconnected.            |       | 0.162 | 0.265 | -0.193 |        | 0.359  |        | 0.195  |        |
| 47. Many things seemed unbelievably funny to me.                                                | 0.236 |       |       |        | 0.257  | 0.333  |        | 0.131  |        |
| <b>f7</b>                                                                                       |       |       |       |        |        |        |        |        |        |
| 14. The shapes of things seemed to change by sounds and noises.                                 | 0.387 |       |       |        |        |        | 0.711  |        |        |
| 51. The colors of things seemed to be changed by sounds and noises.                             | 0.353 |       |       |        |        |        | 0.680  |        |        |
| 11. Noises seemed to influence what I saw.                                                      | 0.237 |       |       |        |        |        | 0.670  |        |        |
| <b>f8</b>                                                                                       |       |       |       |        |        |        |        |        |        |
| 49. I could see pictures from my past or fantasy extremely clearly.                             |       |       |       |        |        |        |        | 0.795  |        |
| 64. I was able to remember certain events unusually clearly.                                    |       |       |       | 0.103  |        |        |        | 0.490  | 0.203  |
| 25. I saw scenes rolling by in total darkness or with my eyes closed.                           | 0.435 |       |       |        |        | -0.126 |        | 0.486  |        |
| 57. My imagination was extremely vivid.                                                         | 0.241 |       | 0.109 | 0.102  | 0.170  | 0.142  |        | 0.361  |        |

|                                                                                                 | f1     | f2     | f3    | f4     | f5     | f6     | f7     | f8     | f9     | f10    |
|-------------------------------------------------------------------------------------------------|--------|--------|-------|--------|--------|--------|--------|--------|--------|--------|
| <b>f1</b>                                                                                       |        |        |       |        |        |        |        |        |        |        |
| 13. I saw colors before me in total darkness or with closed eyes.                               | 0.821  |        |       |        | 0.169  |        |        |        |        |        |
| 8. I saw regular patterns in complete darkness or with closed eyes.                             | 0.753  |        |       |        | 0.147  |        |        |        |        |        |
| 20. I saw lights or flashes of light in total darkness or with closed eyes.                     | 0.482  |        |       |        | 0.125  |        |        |        |        |        |
| 4. I saw things that I knew were not real.                                                      | 0.388  |        |       |        |        |        | 0.234  |        | 0.154  |        |
| <b>f2</b>                                                                                       |        |        |       |        |        |        |        |        |        |        |
| 66. My experience had religious aspects.                                                        |        | 0.817  |       |        |        |        | -0.132 |        |        |        |
| 6. I had the feeling of being connected to a superior power.                                    |        | 0.703  |       |        |        |        | -0.165 |        |        |        |
| 46. I gained clarity into connections that puzzled me before.                                   |        | 0.613  |       |        |        |        |        |        |        | 0.308  |
| 27. I experienced a touch of eternity.                                                          |        | 0.594  |       | 0.311  |        | 0.104  |        |        |        |        |
| 56. I experienced a kind of awe.                                                                |        | 0.588  |       |        |        |        |        | 0.151  |        | 0.138  |
| 26. I felt unusual powers in myself.                                                            |        | 0.553  |       |        |        | 0.128  |        |        |        |        |
| 28. Conflicts and contradictions seemed to dissolve.                                            |        | 0.527  |       | 0.198  | 0.105  | 0.125  |        | 0.103  |        |        |
| 34. I felt very profound.                                                                       |        | 0.506  | 0.115 |        |        |        |        |        |        | 0.222  |
| 9. I felt I was being transformed forever in a marvelous way.                                   |        | 0.499  |       |        |        |        |        | 0.180  |        |        |
| 10. Everything seemed to unify into an oneness.                                                 |        | 0.496  |       | 0.185  |        | 0.167  |        |        |        |        |
| 52. I had very original thoughts.                                                               |        | 0.452  |       |        |        |        | 0.197  |        | 0.102  | 0.220  |
| 61. Everything around me seemed animated.                                                       |        | 0.402  |       |        |        | 0.315  |        |        |        | 0.179  |
| <b>f3</b>                                                                                       |        |        |       |        |        |        |        |        |        |        |
| 63. I had the feeling something horrible would happen.                                          |        | -0.118 | 0.865 |        |        |        | -0.103 |        |        | 0.139  |
| 38. I felt threatened.                                                                          |        |        | 0.845 |        |        |        |        |        |        |        |
| 29. I was afraid without being able to say exactly why.                                         |        |        | 0.776 |        |        |        |        | 0.146  |        |        |
| 12. I felt tormented.                                                                           |        |        | 0.695 | -0.152 |        | -0.133 |        | 0.106  |        |        |
| 19. I was afraid that the state I was in would last forever.                                    | 0.105  |        | 0.688 |        | -0.135 |        |        |        |        |        |
| 32. I experienced my surroundings as strange and weird.                                         |        |        | 0.572 |        |        |        |        | 0.219  |        |        |
| 54. I was afraid to lose my self-control.                                                       |        |        | 0.526 |        |        |        |        | 0.280  |        |        |
| 30. I experienced everything terrifyingly distorted.                                            |        |        | 0.521 |        |        |        |        | 0.335  |        | 0.104  |
| 3. I felt surrendered to dark powers.                                                           | -0.116 | 0.134  | 0.486 |        | 0.125  |        |        | 0.140  |        | -0.249 |
| 59. Time passed tormentingly slow                                                               |        |        | 0.421 |        |        |        | 0.122  |        |        | 0.141  |
| 36. I experienced an unbearable emptiness.                                                      |        |        | 0.415 |        |        |        |        | 0.101  |        | 0.234  |
| <b>f4</b>                                                                                       |        |        |       |        |        |        |        |        |        |        |
| 15. It seemed to me as though I did not have a body anymore.                                    |        | 0.138  |       | 0.736  |        |        |        |        |        |        |
| 42. I had the feeling of being outside of my body.                                              |        | 0.133  |       | 0.665  |        |        |        | 0.181  |        | 0.125  |
| 43. I felt as though I were floating.                                                           |        |        |       | 0.569  |        | 0.177  |        |        |        |        |
| 41. My body seemed to me numb, dead and weird.                                                  |        |        |       | 0.486  |        | -0.176 |        | 0.434  |        |        |
| 35. I experienced past, present and future as an oneness.                                       |        |        | 0.252 | 0.428  |        | 0.104  |        |        |        |        |
| 48. The boundaries between myself and my surroundings seemed to blur.                           |        |        | 0.216 | 0.416  |        |        | 0.104  | 0.152  |        |        |
| 23. Like in a dream, time and space were changed.                                               | 0.221  |        | 0.410 | 0.410  |        | 0.225  | 0.225  |        | 0.145  |        |
| 31. The world appeared to me beyond good and evil.                                              |        |        | 0.284 | 0.326  |        | 0.138  |        | 0.184  |        |        |
| 58. Things around me appeared smaller or larger.                                                |        | -0.128 | 0.123 | 0.325  | 0.160  |        | 0.226  |        |        | 0.121  |
| <b>f5</b>                                                                                       |        |        |       |        |        |        |        |        |        |        |
| 14. The shapes of things seemed to change by sounds and noises.                                 | 0.139  |        |       |        | 0.852  |        |        |        |        |        |
| 51. The colors of things seemed to be changed by sounds and noises.                             | 0.119  |        |       |        | 0.801  |        |        |        |        |        |
| 11. Noises seemed to influence what I saw.                                                      |        |        |       |        | 0.759  |        |        |        |        |        |
| <b>f6</b>                                                                                       |        |        |       |        |        |        |        |        |        |        |
| 60. I experienced a profound peace in myself.                                                   |        |        |       | 0.121  |        | 0.759  | -0.154 |        |        |        |
| 7. I enjoyed boundless pleasure.                                                                |        |        |       |        |        | 0.697  |        |        | 0.127  |        |
| 50. I felt totally free and released from all responsibilities.                                 |        |        |       | 0.255  |        | 0.623  |        |        |        |        |
| 65. I experienced an all-embracing love.                                                        |        | 0.401  |       |        |        | 0.563  |        |        |        | 0.113  |
| 22. Worries and anxieties of everyday life seemed unimportant to me.                            |        |        |       | 0.189  |        | 0.557  |        |        | -0.110 | -0.100 |
| 2. Bodily sensations were very delightful.                                                      |        |        |       |        |        | 0.432  | 0.138  |        |        | 0.140  |
| 39. Many things appeared to be breathtakingly beautiful.                                        | 0.183  | 0.263  |       |        | 0.120  | 0.422  | 0.163  | -0.151 |        |        |
| 21. It seemed to me that my environment and I were one.                                         |        | 0.297  |       | 0.302  |        | 0.396  |        |        |        |        |
| 1. I felt like I was in a fantastic other world.                                                | 0.170  | 0.179  |       | 0.240  |        | 0.242  | 0.208  |        |        |        |
| <b>f7</b>                                                                                       |        |        |       |        |        |        |        |        |        |        |
| 18. Things around me had a new strange meaning for me.                                          |        | 0.366  |       | 0.113  |        |        | 0.626  |        |        |        |
| 17. Everyday things gained a special meaning.                                                   |        | 0.203  |       |        |        |        | 0.583  |        |        |        |
| 37. Objects around me engaged me emotionally much more than usual.                              |        | 0.220  |       |        |        | 0.165  | 0.551  |        |        | 0.181  |
| 47. Many things seemed unbelievably funny to me.                                                | 0.213  |        |       | -0.155 |        | 0.269  | 0.294  |        | 0.125  |        |
| <b>f8</b>                                                                                       |        |        |       |        |        |        |        |        |        |        |
| 33. I felt as though I were paralyzed.                                                          |        |        |       | 0.200  |        | -0.120 |        | 0.596  |        |        |
| 62. Everything around me was happening so fast that I no longer could follow what was going on. | 0.102  |        |       |        |        |        |        | 0.592  |        | 0.211  |
| 16. I had difficulty making even the smallest decision.                                         |        |        |       |        |        |        | 0.104  | 0.587  |        |        |
| 53. I had the feeling that I no longer had a will of my own.                                    |        |        | 0.114 | 0.162  |        |        |        | 0.533  |        |        |
| 44. I felt isolated from everything and everyone.                                               |        |        |       | 0.180  |        |        |        | 0.513  |        |        |
| 45. I was not able to complete a thought, my thought repeatedly became disconnected.            |        | -0.150 |       |        |        |        |        | 0.486  | 0.176  |        |
| 5. I felt like a marionette.                                                                    |        |        | 0.176 |        |        |        |        | 0.453  |        | -0.156 |
| 24. I had difficulty in distinguishing important from unimportant things.                       |        |        |       | 0.169  |        | 0.136  | 0.214  | 0.453  |        |        |
| 55. I stayed frozen in a very unnatural position for quite a long time.                         |        |        |       |        |        |        | 0.116  | 0.376  | 0.121  |        |
| <b>f9</b>                                                                                       |        |        |       |        |        |        |        |        |        |        |
| 49. I could see pictures from my past or fantasy extremely clearly.                             |        |        |       |        |        |        |        |        | 0.806  |        |
| 25. I saw scenes rolling by in total darkness or with my eyes closed.                           | 0.417  |        |       |        |        |        |        |        | 0.491  |        |
| 64. I was able to remember certain events unusually clearly.                                    |        | 0.126  |       |        |        |        |        |        | 0.476  | 0.219  |
| 57. My imagination was extremely vivid.                                                         | 0.232  |        |       |        |        | 0.171  | 0.166  |        | 0.358  |        |
| <b>f10</b>                                                                                      |        |        |       |        |        |        |        |        |        |        |
| 40. Things came to mind, which I thought I had forgotten long ago.                              |        | 0.365  |       |        |        |        |        |        | 0.286  | 0.369  |



|                                                                                                 | f1     | f2     | f3     | f4    | f5     | f6     | f7     | f8     | f9     | f10    | f11    |
|-------------------------------------------------------------------------------------------------|--------|--------|--------|-------|--------|--------|--------|--------|--------|--------|--------|
| <b>f2</b>                                                                                       |        |        |        |       |        |        |        |        |        |        |        |
| 13. I saw colors before me in total darkness or with closed eyes.                               |        | 0.811  |        |       |        | 0.184  |        |        |        |        |        |
| 8. I saw regular patterns in complete darkness or with closed eyes.                             |        | 0.751  |        |       |        | 0.156  |        |        |        |        |        |
| 20. I saw lights or flashes of light in total darkness or with closed eyes.                     |        | 0.485  |        |       |        | 0.127  |        |        |        |        |        |
| 4. I saw things that I knew were not real.                                                      |        | 0.395  |        |       |        |        | 0.237  |        |        |        | 0.145  |
| <b>f3</b>                                                                                       |        |        |        |       |        |        |        |        |        |        |        |
| 66. My experience had religious aspects.                                                        | -0.169 |        | 0.774  |       |        |        | -0.125 |        |        |        |        |
| 46. I gained clarity into connections that puzzled me before.                                   | 0.206  |        | 0.695  |       |        |        |        |        |        |        |        |
| 6. I had the feeling of being connected to a superior power.                                    | -0.239 |        | 0.647  |       |        |        | -0.157 |        |        |        |        |
| 56. I experienced a kind of awe.                                                                |        |        | 0.605  |       |        |        |        |        | 0.162  |        |        |
| 27. I experienced a touch of eternity.                                                          |        |        | 0.573  |       |        |        |        | 0.222  |        | 0.194  |        |
| 34. I felt very profound.                                                                       |        |        | 0.552  | 0.113 |        |        |        |        |        |        |        |
| 26. I felt unusual powers in myself.                                                            | -0.155 |        | 0.533  |       | 0.147  |        |        |        |        |        |        |
| 28. Conflicts and contradictions seemed to dissolve.                                            |        |        | 0.532  |       |        | 0.118  |        |        |        | 0.463  |        |
| 52. I had very original thoughts.                                                               | 0.127  |        | 0.510  |       |        |        | 0.202  |        |        |        | 0.106  |
| 9. I felt I was being transformed forever in a marvelous way.                                   |        |        | 0.491  |       |        |        |        |        | 0.178  |        |        |
| 40. Things came to mind, which I thought I had forgotten long ago.                              | 0.293  |        | 0.479  |       |        |        |        |        |        |        | 0.293  |
| 10. Everything seemed to unify into an oneness.                                                 |        |        | 0.474  |       | 0.103  |        |        |        |        | 0.267  |        |
| 61. Everything around me seemed animated.                                                       |        |        | 0.440  |       | 0.337  |        |        |        |        |        |        |
| 31. The world appeared to me beyond good and evil.                                              |        |        | 0.300  |       |        |        |        | 0.177  | 0.173  | 0.293  |        |
| <b>f4</b>                                                                                       |        |        |        |       |        |        |        |        |        |        |        |
| 63. I had the feeling something horrible would happen.                                          | 0.171  |        |        | 0.880 |        |        | -0.116 |        |        |        |        |
| 38. I felt threatened.                                                                          |        |        |        | 0.842 |        |        |        |        |        |        |        |
| 29. I was afraid without being able to say exactly why.                                         |        |        |        | 0.779 |        |        |        | -0.130 | 0.142  |        |        |
| 19. I was afraid that the state I was in would last forever.                                    |        | 0.108  |        | 0.700 |        | -0.131 |        | -0.140 | 0.102  |        |        |
| 12. I felt tormented.                                                                           |        |        |        | 0.694 | -0.136 |        |        |        | 0.102  |        |        |
| 32. I experienced my surroundings as strange and weird.                                         |        |        |        | 0.568 |        |        |        |        | 0.226  |        |        |
| 54. I was afraid to lose my self-control.                                                       |        |        |        | 0.526 |        |        |        |        | 0.280  |        |        |
| 30. I experienced everything terrifyingly distorted.                                            |        |        |        | 0.521 |        |        |        |        | 0.345  |        |        |
| 3. I felt surrendered to dark powers.                                                           | -0.405 | -0.106 |        | 0.467 |        | 0.103  |        |        | 0.142  |        |        |
| 36. I experienced an unbearable emptiness.                                                      | 0.259  |        |        | 0.434 |        |        |        |        |        |        |        |
| 59. Time passed tormentingly slow                                                               | 0.169  |        | 0.122  | 0.427 |        |        |        | 0.114  |        |        |        |
| <b>f5</b>                                                                                       |        |        |        |       |        |        |        |        |        |        |        |
| 60. I experienced a profound peace in myself.                                                   |        |        |        |       | 0.754  |        | -0.144 |        |        |        |        |
| 7. I enjoyed boundless pleasure.                                                                |        |        |        |       | 0.669  |        |        |        |        | 0.110  | 0.115  |
| 65. I experienced an all-embracing love.                                                        |        |        | 0.419  |       | 0.567  |        |        |        |        |        |        |
| 50. I felt totally free and released from all responsibilities.                                 |        |        |        |       | 0.555  |        |        |        |        | 0.323  |        |
| 2. Bodily sensations were very delightful.                                                      |        |        |        |       | 0.467  |        | 0.152  |        |        |        |        |
| 22. Worries and anxieties of everyday life seemed unimportant to me.                            |        |        |        |       | 0.462  |        |        |        |        | 0.410  | -0.100 |
| 39. Many things appeared to be breathtakingly beautiful.                                        |        | 0.190  | 0.258  |       | 0.442  | 0.109  | 0.180  |        | -0.142 |        |        |
| 1. I felt like I was in a fantastic other world.                                                |        | 0.177  | 0.165  |       | 0.235  |        | 0.216  | 0.222  |        |        |        |
| <b>f6</b>                                                                                       |        |        |        |       |        |        |        |        |        |        |        |
| 14. The shapes of things seemed to change by sounds and noises.                                 |        | 0.133  |        |       |        | 0.844  |        |        |        |        |        |
| 51. The colors of things seemed to be changed by sounds and noises.                             |        | 0.113  |        |       |        | 0.794  |        |        |        |        |        |
| 11. Noises seemed to influence what I saw.                                                      |        |        |        |       |        | 0.751  |        |        | -0.114 | 0.152  |        |
| <b>f7</b>                                                                                       |        |        |        |       |        |        |        |        |        |        |        |
| 18. Things around me had a new strange meaning for me.                                          |        |        | 0.354  |       |        |        | 0.623  | 0.112  |        |        |        |
| 17. Everyday things gained a special meaning.                                                   |        |        | 0.227  |       |        |        | 0.586  |        |        |        |        |
| 37. Objects around me engaged me emotionally much more than usual.                              | 0.123  |        | 0.280  |       | 0.169  |        | 0.553  |        |        |        |        |
| 47. Many things seemed unbelievably funny to me.                                                |        | 0.212  |        |       | 0.249  |        | 0.304  | -0.163 |        |        | 0.121  |
| <b>f8</b>                                                                                       |        |        |        |       |        |        |        |        |        |        |        |
| 15. It seemed to me as though I did not have a body anymore.                                    | -0.112 |        | 0.104  |       |        |        |        | 0.727  |        |        |        |
| 43. I felt as though I were floating.                                                           |        |        |        |       | 0.266  |        |        | 0.664  |        |        | -0.169 |
| 42. I had the feeling of being outside of my body.                                              |        |        | 0.164  |       |        |        |        | 0.636  | 0.199  |        |        |
| 41. My body seemed to me numb, dead and weird.                                                  |        |        |        |       | -0.182 |        |        | 0.445  | 0.426  |        |        |
| 48. The boundaries between myself and my surroundings seemed to blur.                           |        |        | 0.207  |       |        |        | 0.112  | 0.385  | 0.155  |        |        |
| 23. Like in a dream, time and space were changed.                                               |        | 0.228  |        |       | 0.211  |        | 0.227  | 0.368  |        |        | 0.136  |
| 58. Things around me appeared smaller or larger.                                                |        |        |        | 0.111 |        | 0.156  | 0.226  | 0.360  |        |        |        |
| 35. I experienced past, present and future as an oneness.                                       |        |        | 0.263  |       |        |        |        | 0.303  |        |        | 0.259  |
| <b>f9</b>                                                                                       |        |        |        |       |        |        |        |        |        |        |        |
| 62. Everything around me was happening so fast that I no longer could follow what was going on. |        |        |        |       | -0.123 |        |        | 0.198  | 0.619  | -0.139 |        |
| 33. I felt as though I were paralyzed.                                                          |        |        |        |       |        |        |        |        | 0.585  |        |        |
| 16. I had difficulty making even the smallest decision.                                         |        |        |        |       |        |        | 0.111  |        | 0.564  | 0.141  |        |
| 44. I felt isolated from everything and everyone.                                               |        |        |        |       |        |        | 0.111  | 0.204  | 0.515  |        |        |
| 53. I had the feeling that I no longer had a will of my own.                                    |        |        |        | 0.123 |        |        |        |        | 0.505  | 0.217  |        |
| 45. I was not able to complete a thought, my thought repeatedly became disconnected.            |        |        | -0.138 |       |        |        | 0.274  |        | 0.475  |        | 0.167  |
| 5. I felt like a marionette.                                                                    | -0.167 |        |        | 0.174 | -0.107 |        |        |        | 0.430  |        |        |
| 24. I had difficulty in distinguishing important from unimportant things.                       |        |        |        |       |        |        | 0.214  |        | 0.429  | 0.253  |        |
| 55. I stayed frozen in a very unnatural position for quite a long time.                         | -0.105 |        |        |       |        |        | 0.127  |        | 0.376  |        | 0.111  |
| <b>f10</b>                                                                                      |        |        |        |       |        |        |        |        |        |        |        |
| 21. It seemed to me that my environment and I were one.                                         |        |        | 0.272  |       | 0.318  |        |        | 0.158  |        | 0.328  |        |
| <b>f11</b>                                                                                      |        |        |        |       |        |        |        |        |        |        |        |
| 49. I could see pictures from my past or fantasy extremely clearly.                             |        |        | 0.104  |       |        |        |        |        |        |        | 0.792  |
| 25. I saw scenes rolling by in total darkness or with my eyes closed.                           |        | 0.430  |        |       |        |        |        |        |        |        | 0.481  |
| 64. I was able to remember certain events unusually clearly.                                    | 0.178  |        | 0.200  |       |        |        |        |        |        |        | 0.472  |
| 57. My imagination was extremely vivid.                                                         |        | 0.239  | 0.124  |       | 0.172  |        | 0.172  |        |        |        | 0.348  |
