# Supplementary material for: Psychometric Evaluation of the Altered States of Consciousness Rating Scale (OAV)
Source: PubMed Central journal article supplement (PMC2930851; doi:10.1371/journal.pone.0012412), 2010-08-31
Supplement: pone.0012412.s009.pdf [file pone.0012412.s009.pdf]

**Supplementary Table S7.** Y-standardized regression coefficients [and 95% confidence intervals] of MIMIC model with dose predictors and DIF.

| Factor                         | PET                          | Female                       | OAV                          | Psilo LD                       | Psilo MD 1                   | Psilo MD 2                   | Psilo HD                     | Ket MD                         | Ket HD                         |
|--------------------------------|------------------------------|------------------------------|------------------------------|--------------------------------|------------------------------|------------------------------|------------------------------|--------------------------------|--------------------------------|
| Experience of unity            | <b>0.25</b><br>[ 0.03, 0.47] | <b>0.25</b><br>[ 0.03, 0.47] | 0.01<br>[-0.25, 0.27]        | <b>-0.37</b><br>[-0.69, -0.05] | 0.31<br>[-0.08, 0.69]        | 0.19<br>[-0.06, 0.45]        | <b>0.55</b><br>[ 0.11, 0.99] | 0.19<br>[-0.28, 0.66]          | <b>0.54</b><br>[ 0.24, 0.83]   |
| Spiritual experience           | <b>0.26</b><br>[ 0.01, 0.51] | 0.09<br>[-0.18, 0.36]        | 0.14<br>[-0.17, 0.45]        | 0.06<br>[-0.30, 0.41]          | 0.41<br>[-0.03, 0.86]        | <b>0.46</b><br>[ 0.20, 0.71] | <b>0.62</b><br>[ 0.20, 1.05] | 0.10<br>[-0.37, 0.57]          | <b>0.51</b><br>[ 0.21, 0.81]   |
| Blissful state                 | 0.18<br>[-0.06, 0.43]        | 0.05<br>[-0.16, 0.27]        | 0.13<br>[-0.15, 0.40]        | <b>-0.57</b><br>[-0.94, -0.20] | 0.04<br>[-0.39, 0.47]        | -0.06<br>[-0.34, 0.23]       | 0.16<br>[-0.28, 0.59]        | <b>-0.66</b><br>[-1.11, -0.21] | <b>-0.50</b><br>[-0.80, -0.19] |
| Insightfulness                 | <b>0.26</b><br>[ 0.01, 0.51] | -0.16<br>[-0.39, 0.07]       | <b>0.35</b><br>[ 0.05, 0.64] | 0.21<br>[-0.11, 0.54]          | <b>0.78</b><br>[ 0.37, 1.19] | <b>0.61</b><br>[ 0.34, 0.88] | <b>1.12</b><br>[ 0.62, 1.61] | 0.38<br>[-0.17, 0.93]          | 0.29<br>[-0.01, 0.59]          |
| Disembodiment                  | <b>0.55</b><br>[ 0.33, 0.77] | <b>0.24</b><br>[ 0.02, 0.45] | -0.04<br>[-0.27, 0.18]       | -0.21<br>[-0.50, 0.08]         | 0.33<br>[-0.03, 0.69]        | 0.06<br>[-0.16, 0.28]        | <b>0.57</b><br>[ 0.14, 0.99] | <b>0.62</b><br>[ 0.13, 1.11]   | <b>0.93</b><br>[ 0.67, 1.19]   |
| Impaired control and cognition | 0.15<br>[-0.07, 0.38]        | <b>0.38</b><br>[ 0.14, 0.62] | -0.16<br>[-0.39, 0.07]       | <b>-0.28</b><br>[-0.54, -0.02] | <b>0.38</b><br>[ 0.06, 0.70] | <b>0.37</b><br>[ 0.14, 0.60] | <b>0.74</b><br>[ 0.31, 1.18] | <b>0.95</b><br>[ 0.44, 1.46]   | <b>0.93</b><br>[ 0.65, 1.20]   |
| Anxiety                        | <b>0.32</b><br>[ 0.08, 0.56] | 0.05<br>[-0.15, 0.25]        | -0.16<br>[-0.39, 0.06]       | -0.07<br>[-0.33, 0.18]         | 0.11<br>[-0.15, 0.37]        | <b>0.24</b><br>[ 0.05, 0.43] | <b>0.55</b><br>[ 0.03, 1.07] | -0.10<br>[-0.56, 0.37]         | <b>0.56</b><br>[ 0.29, 0.84]   |
| Complex imagery                | <b>0.52</b><br>[ 0.30, 0.75] | 0.12<br>[-0.11, 0.35]        | -0.04<br>[-0.28, 0.20]       | <b>0.44</b><br>[ 0.11, 0.77]   | <b>1.16</b><br>[ 0.81, 1.51] | <b>0.83</b><br>[ 0.61, 1.04] | <b>1.39</b><br>[ 0.98, 1.79] | 0.20<br>[-0.27, 0.67]          | <b>0.69</b><br>[ 0.42, 0.96]   |
| Elementary imagery             | <b>0.28</b><br>[ 0.10, 0.47] | 0.05<br>[-0.13, 0.23]        | -0.01<br>[-0.20, 0.19]       | <b>0.75</b><br>[ 0.49, 1.02]   | <b>1.46</b><br>[ 1.18, 1.74] | <b>1.45</b><br>[ 1.25, 1.64] | <b>1.71</b><br>[ 1.37, 2.05] | <b>0.65</b><br>[ 0.27, 1.03]   | <b>0.82</b><br>[ 0.58, 1.07]   |
| Audio-visual synesthesiae      | -0.10<br>[-0.31, 0.11]       | 0.06<br>[-0.16, 0.28]        | 0.16<br>[-0.08, 0.39]        | <b>0.35</b><br>[ 0.09, 0.61]   | <b>0.86</b><br>[ 0.52, 1.20] | <b>0.90</b><br>[ 0.69, 1.10] | <b>1.31</b><br>[ 0.92, 1.71] | <b>0.60</b><br>[ 0.20, 1.00]   | <b>0.62</b><br>[ 0.35, 0.89]   |
| Changed meaning of percepts    | <b>0.37</b><br>[ 0.14, 0.59] | -0.04<br>[-0.30, 0.22]       | 0.20<br>[-0.06, 0.47]        | -0.04<br>[-0.36, 0.29]         | <b>0.85</b><br>[ 0.48, 1.21] | <b>0.53</b><br>[ 0.27, 0.79] | <b>0.95</b><br>[ 0.50, 1.39] | 0.20<br>[-0.26, 0.66]          | 0.17<br>[-0.16, 0.49]          |

*Note.* Significant regression coefficients ( $p < .05$ ) are in boldface. By convention, y-standardized regression coefficients of dummy coded variables of the sizes 0.2, 0.5, and 0.8 indicate small, medium, and large effect sizes, respectively. MIMIC = multiple indicators multiple causes; DIF = differential item functioning; PET = positron emission tomography (0 = no PET, 1 = PET); Female (0 = male, 1 = female); OAV = Altered state of consciousness rating scale version (0 = OAV, 1 = 5D-ASC); Psilo LD (0 = all drug conditions except 115 µg/kg psilocybin, 1 = 115 µg/kg psilocybin); Psilo MD 1 (0 = all drug conditions except 215-225 µg/kg psilocybin, 1 = 215-225 µg/kg psilocybin); Psilo MD 2 (0 = all drug conditions except 250-270 µg/kg psilocybin, 1 = 250-270 µg/kg psilocybin); Psilo HD (0 = all drug conditions except 315 µg/kg psilocybin, 1 = 315 µg/kg psilocybin); Ket MD (0 = all drug conditions except 6 µg/kg/min ketamine, 1 = 6 µg/kg/min); Ket HD (0 = all drug conditions except 12 µg/kg/min ketamine, 1 = 12 µg/kg/min ketamine).
